# Supplementary material for: Which specific modes of exercise training are most effective for treating low back pain? Network meta-analysis
Source: PubMed Central journal article supplement — Br J Sports Med. 2019 Oct 30;54(21):1279–87. doi: 10.1136/bjsports-2019-100886 (PMC7588406; doi:10.1136/bjsports-2019-100886), 2019-10-30
Supplement: bjsports-2019-100886supp001.pdf [file bjsports-2019-100886supp001.pdf]

**SUPPLEMENTARY FIGURES**

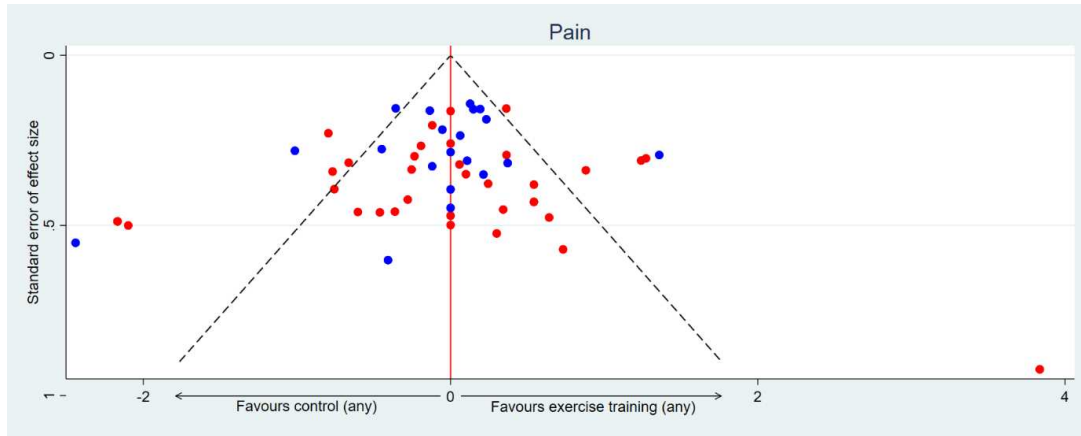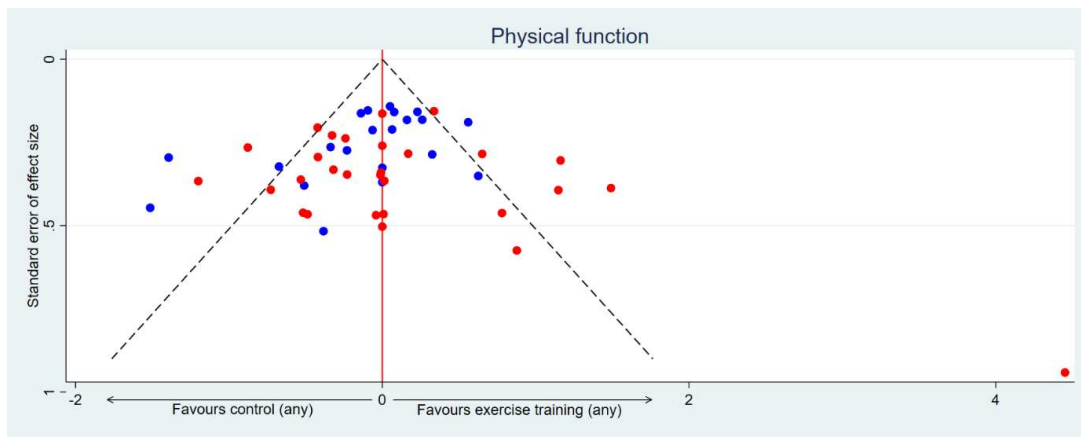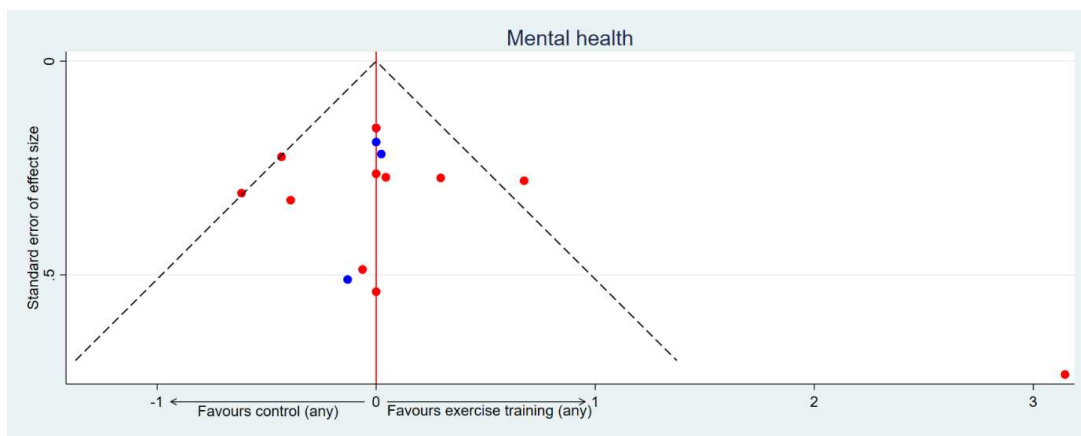

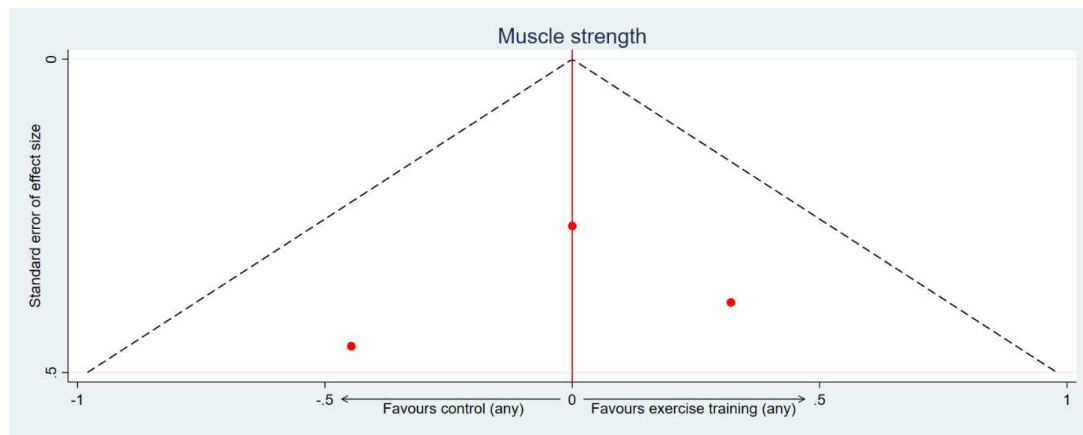

**Supplementary Figure 1.** Network meta-analysis funnel plots for the assessment of publication bias in studies comparing exercise training (any) to true control (red) or hands-on/hands-off control (blue) in patients with non-specific chronic low back pain.

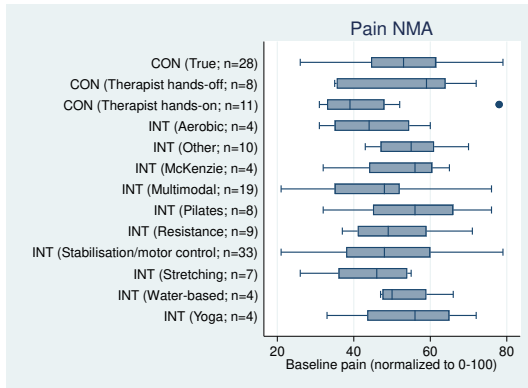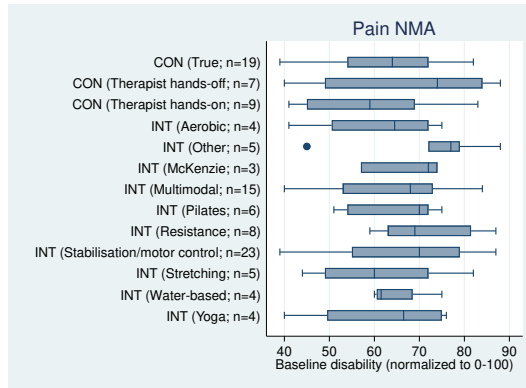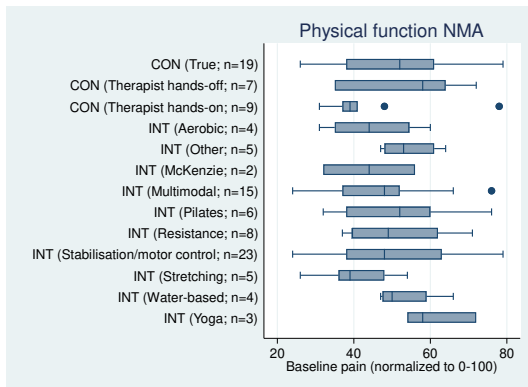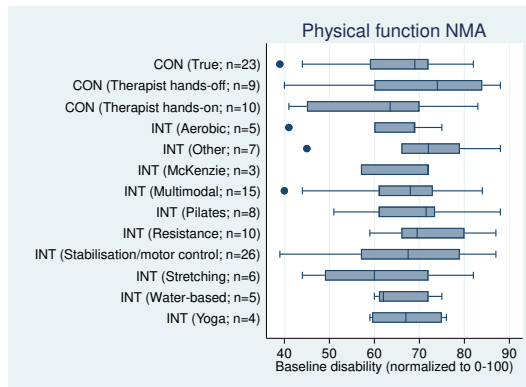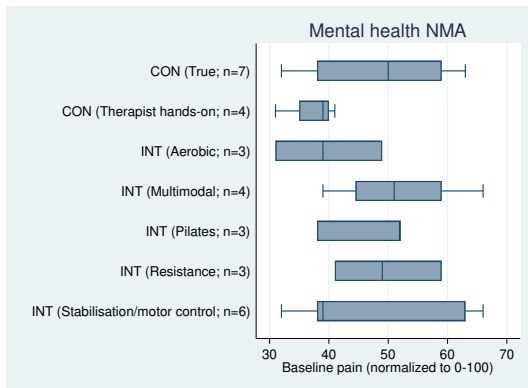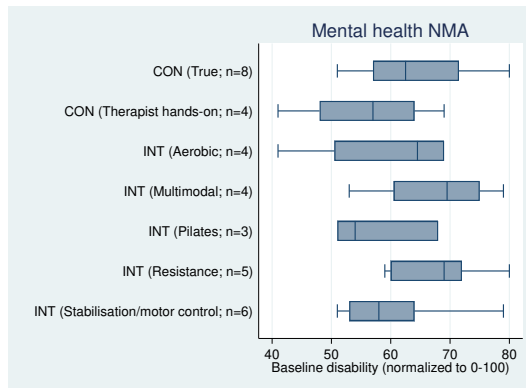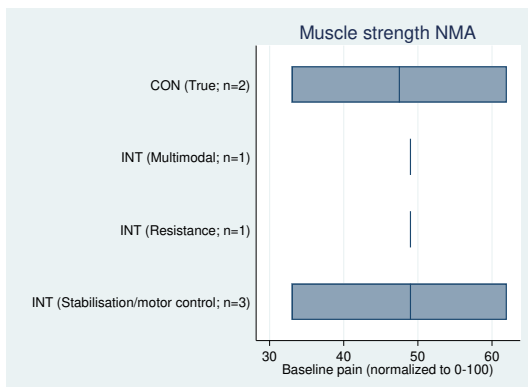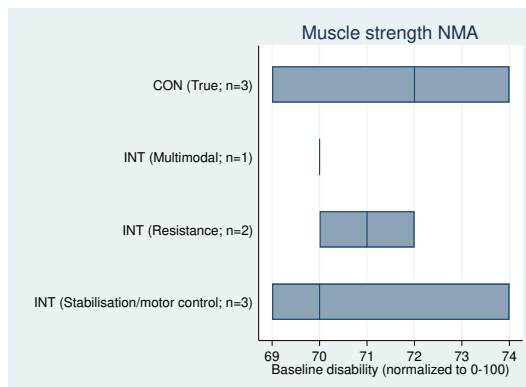

**Supplementary Figure 2.** Baseline pain and disability (normalized to 0-100) for each intervention (INT) and control (CON) group within each network meta-analysis (NMA). n: number of studies with reporting of this baseline data in each exercise intervention (INT) or control (CON). Data were re-scaled from the original reported data to 0-100 where 0=no pain/disability and 100=scale maximum for pain/disability. One-way analysis of variance did not present evidence for differences between treatment types on these baseline data (all:  $P \geq 0.460$ ).

**SUPPLEMENTARY TABLES****Supplementary Table 1.** Search terms used for electronic searches.

| <b>Pain terms combined with 'OR'</b> | <b>Exercise terms combined with 'OR'</b> |
|--------------------------------------|------------------------------------------|
| Back pain*                           | Exercise                                 |
| Lumb* pain                           | Physical activity                        |
| Lumbago                              | Aerobic                                  |
| Backache*                            | Resistance                               |
| Back ache*                           | Strength                                 |
|                                      | Endurance                                |
|                                      | Yoga                                     |
|                                      | Pilates                                  |
|                                      | Tai Chi                                  |
|                                      | Physiotherapy                            |
|                                      | Physical therapy                         |
|                                      | Kinesiology                              |
|                                      | Feldenkrais                              |
|                                      | Core stab*                               |
|                                      | Motor control                            |
|                                      | Hydrotherapy                             |
|                                      | Training                                 |

**Supplementary Table 2.** Search strategy for MEDLINE.

| Search | Query                                                                                                                                                                                                                                                     | Hits    |
|--------|-----------------------------------------------------------------------------------------------------------------------------------------------------------------------------------------------------------------------------------------------------------|---------|
| #1     | “back pain*” OR “lumb* pain” OR lumbago OR backache* OR “back ache*”                                                                                                                                                                                      | 79565   |
| #2     | exercise OR “physical activity” OR aerobic OR resistance OR strength OR endurance OR yoga OR pilates OR “tai chi” OR “physiotherapy” OR “physical therapy” OR kinesiology OR Feldenkrais OR “core stab*” OR “motor control” OR “hydrotherapy” OR training | 3136931 |
| #3     | #1 AND #2                                                                                                                                                                                                                                                 | 16655   |
| #4     | #3 AND Filter: Randomized controlled trial                                                                                                                                                                                                                | 1867    |
| #5     | #4 AND Filter: Human                                                                                                                                                                                                                                      | 1860    |
| #6     | #5 AND Filter: Adult                                                                                                                                                                                                                                      | 1651    |

**Supplementary Table 3.** Characteristics of studies examining the efficacy of exercise training in patients with non-specific chronic low back pain.

| Study                                       | n   | Mean age (years) | Sex (males, n) | Mean baseline pain duration (weeks) | Mean baseline pain intensity (/100) | Study duration (weeks) | Exercise training intervention 1 (INT1; type, sample, frequency) | Exercise training intervention 2 (INT2; type, sample, frequency) | Non-exercise training comparator (CON; type, sample, frequency) | End-intervention mean(standard deviation) |                                    |                                    |                  |                           |                                 |
|---------------------------------------------|-----|------------------|----------------|-------------------------------------|-------------------------------------|------------------------|------------------------------------------------------------------|------------------------------------------------------------------|-----------------------------------------------------------------|-------------------------------------------|------------------------------------|------------------------------------|------------------|---------------------------|---------------------------------|
|                                             |     |                  |                |                                     |                                     |                        |                                                                  |                                                                  |                                                                 | Pain                                      | Physical function                  | Muscle strength                    | Muscle endurance | Analgesic pharmacotherapy | Mental health                   |
| Akbari et al. 2008 <sup>[75]</sup>          | 49  | 40               | NR             | 45                                  | 24                                  | 8                      | Stabilisation/motor control (n=25); 2/wk                         | Multimodal (n=24); 2/wk                                          | -                                                               | INT1=2.5(1.2)<br>INT2=4.0(1.5)            | -                                  | -                                  | -                | -                         | -                               |
| Ali et al. 2013 <sup>[76]</sup>             | 30  | 38               | NR             | 12                                  | 56                                  | 6                      | Stabilisation/motor control (n=15); 3/wk                         | McKenzie (n=15); 3/wk                                            | -                                                               | INT1=1.5(1.4)<br>INT2=2.7 (1.4)           | INT1=12.3(8.9)<br>INT2=22.9(13.5)  | -                                  | -                | -                         | -                               |
| Arampatzis et al. 2017 <sup>[78]</sup>      | 40  | 32               | 23             | 12                                  | 59                                  | 13                     | Other (n=20); 2/wk                                               | -                                                                | True (n=20)                                                     | INT1=3.0(1.9)<br>CON=3.9(1.9)             | -                                  | -                                  | -                | -                         | -                               |
| Areeudomwong et al. 2016 <sup>[78]</sup>    | 42  | 36               | 11             | 42                                  | 59                                  | 4                      | Resistance (n=21); 5/wk                                          | -                                                                | True (n=21)                                                     | INT1=1.5(1.2)<br>CON=3.1(1.5)             | INT1=1.7(0.6)<br>CON=3.9(1.3)      | -                                  | -                | -                         | INT1=49.9(5.5)<br>CON=50.0(8.0) |
| Bae et al. 2018 <sup>[79]</sup>             | 36  | 33               | 20             | 60                                  | 71                                  | 4                      | Stabilisation/motor control (n=18); 3/wk                         | Resistance (n=18); 3/wk                                          | -                                                               | INT1=2.1(0.9)<br>INT2=1.5(1.3)            | INT1=12.0(10.1)<br>INT2=8.0(7.7)   | -                                  | -                | -                         | -                               |
| Brooks et al. 2012 <sup>[33]</sup>          | 64  | 36               | 24             | 537                                 | 60                                  | 8                      | Pilates (n=32); 3/wk                                             | Aerobic (n=32); 3/wk                                             | -                                                               | INT1=2.2(1.7)<br>INT2=3.4(2.4)            | INT1=15.8(13.3)<br>INT2=20.3(16.2) | -                                  | -                | -                         | -                               |
| Byoung-Hwan et al. 2015 <sup>[80]</sup>     | 30  | 46               | 30             | 12                                  | 33                                  | 12                     | ^Stabilisation/motor control (n=20); 5/wk                        | -                                                                | True (n=10)                                                     | INT1=4.9(1.2)<br>CON=5.4(0.9)             | INT1=12.1(5.4)<br>CON=14.5(4.7)    | INT1=97.9(30.4)<br>CON=103.7(27.4) | -                | -                         | -                               |
| Cai et al. 2017 <sup>[81]</sup>             | 84  | 27               | 42             | 65                                  | 65                                  | 8                      | ^Resistance (n=56); 2/wk                                         | Stabilisation/motor control (n=28); 2/wk                         | -                                                               | INT1=0.6(0.7)<br>INT2=0.7(0.6)            | INT1=9.0(0.8)<br>INT2=8.8(0.8)     | -                                  | -                | -                         | -                               |
| Chae-Woo et al. 2014 <sup>[82]</sup>        | 40  | 35               | NR             | 12                                  | 21                                  | 6                      | Other (n=20); 4/wk                                               | Stabilisation/motor control (n=20); 4/wk                         | -                                                               | INT1=1.5(0.7)<br>INT2=2.1(0.9)            | -                                  | -                                  | -                | -                         | -                               |
| Chatzitheodorou et al. 2007 <sup>[83]</sup> | 20  | 42               | 11             | 26                                  | 31                                  | 12                     | Aerobic (n=10); 3/wk                                             | -                                                                | Therapist hands-on (n=10)                                       | INT1=32.3(7.9)<br>CON=53.3(10.0)          | INT1=9.6(2.6)<br>CON=14.3(3.6)     | -                                  | -                | -                         | INT1=16.2(3.4)<br>CON=21.9(4.5) |
| Cho et al. 2014 <sup>[84]</sup>             | 30  | 37               | 11             | 61                                  | 60                                  | 4                      | Stabilisation/motor control (n=15); 3/wk                         | -                                                                | Therapist hands-off (n=15)                                      | INT1=21.5(5.7)<br>CON=37.6(10.5)          | -                                  | -                                  | -                | -                         | -                               |
| Costa et al. 2009 <sup>[85]</sup>           | 154 | 54               | 61             | 332                                 | 33                                  | 8                      | Stabilisation/motor control (n=77); 1.5/wk                       | -                                                                | Therapist hands-on (n=77); 1.5/wk                               | INT1=4.6(2.8)<br>CON=5.6(2.6)             | INT1=9.6(6.5)<br>CON=11.9(5.9)     | -                                  | -                | -                         | -                               |
| Cruz-Diaz et al. 2017 <sup>[86]</sup>       | 98  | 36               | 35             | 12                                  | 52                                  | 12                     | ^Pilates (n=68); 2/wk                                            | -                                                                | True (n=30)                                                     | INT1=1.9(1.6)<br>CON=5.0(1.3)             | INT1=5.6(5.1)<br>CON=10.4(5.6)     | -                                  | -                | -                         | INT1=31.9(3.4)<br>CON=34.1(4.0) |
| Cruz-Diaz et al. 2018 <sup>[84]</sup>       | 64  | 37               | 23             | 13                                  | NR                                  | 12                     | Pilates (n=32); 2/wk                                             | -                                                                | True (n=32)                                                     | -                                         | -                                  | -                                  | -                | -                         | -                               |
| del Pozo-Cruz et al. 2011 <sup>[87]</sup>   | 49  | 59               | 13             | 26                                  | 61                                  | 12                     | Other (n=25); 2/wk                                               | -                                                                | True (n=24)                                                     | INT1=29.0(13.0)<br>CON=39.7(14.8)         | INT1=20.3(10.9)<br>CON=29.2(15.6)  | -                                  | -                | -                         | -                               |

|                                                |     |    |     |     |    |    |                                           |                                            |                                   |                                                    |                                                      |                                    |                                                      |                                                   |
|------------------------------------------------|-----|----|-----|-----|----|----|-------------------------------------------|--------------------------------------------|-----------------------------------|----------------------------------------------------|------------------------------------------------------|------------------------------------|------------------------------------------------------|---------------------------------------------------|
| Dundar et al. 2009 <sup>[88]</sup>             | 65  | 35 | 34  | 39  | 52 | 4  | Water-based (n=32); 5/wk                  | Multimodal (n=33); 5/wk                    | -                                 | INT1=1.7(1.1)<br>INT2=1.9(1.3)                     | INT1=20.8(7.6)<br>INT2=29.9(8.5)                     | -                                  | -                                                    | INT1=22.7(5.3)<br>INT2=22.1(3.6)                  |
| Ferreira et al. 2007 <sup>[25]</sup>           | 240 | 54 | 75  | 226 | 37 | 8  | Multimodal (n=80); 1.5/wk                 | Stabilisation/motor control (n=80); 1.5/wk | Therapist hands-on (n=80); 1.5/wk | INT1=4.8(2.4)<br>INT2=4.0(2.5)<br>CON=4.1(2.6)     | INT1=9.7(6.3)<br>INT2=7.9(5.7)<br>CON=7.9(6.0)       | -                                  | -                                                    | -                                                 |
| Franca et al. 2010 <sup>[90]</sup>             | 30  | 42 | 8   | 87  | 38 | 6  | Stabilisation/motor control (n=15); 2/wk  | Other (n=15); 2/wk                         | -                                 | INT1=0.1(0.2)<br>INT2=2.9(1.5)                     | INT1=1.8(1.3)<br>INT2=8.4(3.1)                       | -                                  | -                                                    | -                                                 |
| Franca et al. 2012 <sup>[89]</sup>             | 30  | 42 | NR  | 89  | 39 | 6  | Stabilisation/motor control (n=15); 2/wk  | Stretching (n=15); 2/wk                    | -                                 | INT1=0.1(0.2)<br>INT2=3.2(1.2)                     | INT1=1.8(1.3)<br>INT2=9.2(4.1)                       | -                                  | -                                                    | -                                                 |
| Gak et al. 2015 <sup>[91]</sup>                | 30  | 34 | 17  | 12  | 50 | 6  | Stabilisation/motor control (n=15); 3/wk  | Multimodal (n=15); 3/wk                    | -                                 | INT1=1.6(0.6)<br>INT2=2.1(8.9)                     | -                                                    | -                                  | -                                                    | -                                                 |
| Groessler et al. 2017 <sup>[35]</sup>          | 150 | 53 | 109 | 26  | 54 | 12 | Yoga (n=75); 2/wk                         | -                                          | True (n=75)                       | INT1=4.1(1.9)<br>CON=4.6(2.2)                      | INT1=7.3(6.0)<br>CON=8.3(5.8)                        | -                                  | -                                                    | -                                                 |
| Gur et al. 2003 <sup>[92]</sup>                | 50  | 36 | 15  | 65  | 37 | 4  | Resistance (n=25); 10/wk                  | -                                          | Therapist hands-on (n=25); 5/wk   | INT1=2.9(1.3)<br>CON=1.9(1.4)                      | INT1=13.6(7.2)<br>CON=16.7(7.6)                      | -                                  | -                                                    | -                                                 |
| Harts et al. 2009 <sup>[93]</sup>              | 65  | 42 | 65  | 168 | NR | 8  | ^Resistance (n=44); 1.25/wk               | -                                          | True (n=21)                       | -                                                  | INT1=4.7(5.1)<br>CON=5.2(3.9)                        | INT=224.4(66.9)<br>CON=208.0(62.0) | -                                                    | INT1=90.6(10.5)<br>CON=81.0(21.0)                 |
| Hasanpour-Dehkordi et al. 2017 <sup>[94]</sup> | 36  | 48 | 36  | 13  | 65 | 12 | McKenzie (n=12); 3/wk                     | Pilates (n=12); 3/wk                       | True (n=12)                       | INT1=19.3(7.5)<br>INT2=13.3(6.4)<br>CON=36.0(13.8) | -                                                    | -                                  | -                                                    | -                                                 |
| Heidari et al. 2018 <sup>[95]</sup>            | 32  | 35 | 0   | 12  | NR | 8  | ^Stabilisation/motor control (n=22); 1/wk | -                                          | True (n=10)                       | -                                                  | INT1=15.0(12.9)<br>CON=40.1(11.5)                    | -                                  | -                                                    | -                                                 |
| Hosseiniifar et al. 2013 <sup>[97]</sup>       | 30  | 38 | NR  | 13  | 56 | 6  | Stabilisation/motor control (n=15); 3/wk  | McKenzie (n=15); 3/wk                      | -                                 | INT1=1.5(1.4)<br>INT2=2.7(1.4)                     | INT1=16.7(8.6)<br>INT2=35.0(20.6)                    | -                                  | -                                                    | -                                                 |
| Hosseiniifar et al. 2018 <sup>[96]</sup>       | 20  | 32 | NR  | 13  | 48 | 6  | Other (n=10); 4/wk                        | Stabilisation/motor control (n=10); 4/wk   | -                                 | INT1=4.3(2.1)<br>INT2=1.3(0.8)                     | INT1=22.7(14.5)<br>INT2=5.3(3.9)                     | -                                  | -                                                    | -                                                 |
| Igsoo et al. 2015 <sup>[98]</sup>              | 30  | 46 | 9   | 12  | NR | 6  | Stabilisation/motor control (n=15); 3/wk  | -                                          | Therapist hands-on (n=15); 3/wk   | -                                                  | INT1=18.4(8.3)<br>CON=26.2(11.9)                     | -                                  | -                                                    | -                                                 |
| Kankaanpaa et al. 1999 <sup>[99]</sup>         | 54  | 40 | 35  | 424 | 48 | 12 | Multimodal (n=30); 2/wk                   | -                                          | Therapist hands-on (n=24), 0.3/wk | INT1=35.5(26.3)<br>CON=43.8(25.0)                  | INT1=10.8(11.2)<br>CON=10.9(10.7)                    | -                                  | -                                                    | -                                                 |
| Keane 2017 <sup>[37]</sup>                     | 29  | 46 | 5   | 13  | 48 | 12 | Stretching (n=10); 2/wk                   | Water-based (n=10); 2/wk                   | True (n=9)                        | INT1=3.6(2.0)<br>INT2=2.1(2.3)<br>CON=4.4(3.2)     | INT1=26.8(16.4)<br>INT2=29.2(19.3)<br>CON=39.2(19.9) | -                                  | -                                                    | INT1=31.8(6.8)<br>INT2=31.1(6.5)<br>CON=42.0(8.1) |
| Kell et al. 2009 <sup>[100]</sup>              | 27  | 37 | 16  | 120 | 49 | 16 | Resistance (n=9); 3/wk                    | Aerobic (n=9); 3/wk                        | True (n=9)                        | INT1=3.3(0.5)<br>INT2=4.8(0.8)<br>CON=4.8(0.7)     | INT1=24.2(2.0)<br>INT2=35.9(2.5)<br>CON=39.1(3.3)    | -                                  | INT1=95.0(38.5)<br>INT2=75.7(14.8)<br>CON=70.9(18.8) | INT1=50.6(3.0)<br>INT2=45.8(1.4)<br>CON=41.6(2.3) |
| Kell et al. 2011 <sup>[101]</sup>              | 240 | 43 | 157 | 162 | 41 | 13 | ^Resistance (n=180); 3/wk                 | -                                          | Therapist hands-on (n=60)         | INT1=4.7(1.0)<br>CON=5.7(0.9)                      | INT1=30.2(10.9)<br>CON=39.1(10.1)                    | -                                  | -                                                    | INT1=54.5(8.1)<br>CON=46.0(8.2)                   |
| Kim et al. 2018 <sup>[102]</sup>               | 30  | 40 | 17  | 12  | 35 | 6  | Multimodal (n=15); 5/wk                   | -                                          | Therapist hands-off               | INT1=2.4(0.5)<br>CON=4.6(0.9)                      | INT1=21.3(3.4)<br>CON=28.9(4.6)                      | -                                  | -                                                    | -                                                 |





|                                               |     |    |    |     |    |    |                                          |                                           |                                  |                                   |                                                                     |                                                                         |   |                                   |
|-----------------------------------------------|-----|----|----|-----|----|----|------------------------------------------|-------------------------------------------|----------------------------------|-----------------------------------|---------------------------------------------------------------------|-------------------------------------------------------------------------|---|-----------------------------------|
| Nambi et al. 2014 <sup>[114]</sup>            | 60  | 44 | 28 | 13  | 33 | 4  | Yoga (n=30); 6/wk                        | Multimodal (n=30); 3/wk                   | -                                | INT1=3.8(1.0)<br>INT2=5.3(0.8)    | INT1=7.7(2.3)<br>INT2=12.0(2.7)                                     | -                                                                       | - | INT1=8.4(2.1)<br>INT2=10.5(3.0)   |
| Noormohammadpour et al. 2018 <sup>[115]</sup> | 20  | 42 | NR | 75  | 63 | 8  | Stabilisation/motor control (n=10); 1/wk | -                                         | True (n=10)                      | INT1=4.0(5.4)<br>CON=25.2(17.7)   | INT1=1.7(2.4)<br>CON=7.9(3.3)                                       | -                                                                       | - | INT1=80.4(15.7)<br>CON=64.4(11.8) |
| Oh et al. 2014 <sup>[116]</sup>               | 37  | 32 | 37 | 29  | 57 | 8  | ^Other (n=28); 5/wk                      | -                                         | True (n=9)                       | INT1=1.9(0.6)<br>CON=3.8(0.9)     | -                                                                   | INT1=195.5(16.6)<br>CON=176.2(14.1)                                     | - | -                                 |
| Palekar et al. 2015 <sup>[43]</sup>           | 52  | 37 | 52 | 13  | 54 | 6  | Stabilisation/motor control (n=26); 4/wk | Other (n=26); 4/wk                        | -                                | -                                 | -                                                                   | -                                                                       | - | -                                 |
| Patti et al. 2016 <sup>[29]</sup>             | 38  | 42 | 38 | 52  | NR | 14 | Pilates (n=19); 3/wk                     | -                                         | Therapist hands-off (n=9)        | -                                 | INT1=6.6(4.0)<br>CON=8.3(7.9)                                       | -                                                                       | - | -                                 |
| Puppin et al. 2011 <sup>[117]</sup>           | 55  | 38 | 25 | 12  | 54 | 8  | Stretching (n=30); 2/wk                  | -                                         | True (n=25)                      | INT1=1.5(1.6)<br>CON=3.8(2.4)     | INT1=13.6(12.3)<br>CON=25.1(14.2)                                   | -                                                                       | - | -                                 |
| Saggini et al. 2004 <sup>[45]</sup>           | 40  | 44 | 15 | 52  | NR | 7  | Water-based (n=20); 3/wk                 | Multimodal (n=20); 3/wk                   | -                                | -                                 | -                                                                   | -                                                                       | - | -                                 |
| Saper et al. 2017 <sup>[46]</sup>             | 191 | 46 | 77 | 12  | 46 | 12 | Yoga (n=127); 1/wk                       | -                                         | Therapist hands-off (n=64)       | -                                 | -                                                                   | -                                                                       | - | -                                 |
| Sang Wk et al. 2015 <sup>[118]</sup>          | 69  | 56 | 69 | 13  | 42 | 6  | ^Multimodal (n=36); 3/wk                 | ^Stabilisation/motor control (n=37); 3/wk | -                                | INT1=40.6(8.9)<br>INT2=35.4(10.0) | INT1=18.1(9.3)<br>INT2=19.8(10.9)                                   | -                                                                       | - | -                                 |
| Schinhan et al. 2016 <sup>[119]</sup>         | 30  | 28 | 30 | 293 | 64 | 8  | Other (n=15); 1.25/wk                    | -                                         | Therapist hands-off (n=15)       | INT1=1.2(1.3)<br>CON=2.9(1.8)     | INT1=7.6(7.1)<br>CON=10.8(8.4)                                      | -                                                                       | - | -                                 |
| Sedaghati et al. 2017 <sup>[120]</sup>        | 68  | 25 | 0  | 12  | NR |    | Water-based (n=17); 3/wk                 | McKenzie (n=17); 3/wk                     | *Other (n=17); 3/wk              | -                                 | INT1=21.2(3.1)<br>INT2=25.5(3.3)<br>INT3=23.0(3.0)<br>CON=27.5(3.0) | INT1=80.5(15.0)<br>INT2=84.1(12.3)<br>INT3=76.5(10.2)<br>CON=58.2(10.7) | - | -                                 |
| Segal-Snir et al. 2016 <sup>[158]</sup>       | 35  | 56 | 0  | 12  | 26 | 4  | Stretching (n=20); 2/wk                  | -                                         | True (n=15)                      | INT1=7.0(1.9)<br>CON=7.0(3.0)     | INT1=11.0(6.4)<br>CON=14.0(6.3)                                     | -                                                                       | - | -                                 |
| Se-Hun et al. 2015 <sup>[122]</sup>           | 30  | 34 | 30 | 13  | NR | 4  | Stabilisation/motor control (n=15); 3/wk | Other (n=15); 3/wk                        | -                                | -                                 | INT1=80.7(11.9)<br>INT2=83.2(13.2)                                  | -                                                                       | - | -                                 |
| Seong Hun et al. 2016 <sup>[123]</sup>        | 40  | 70 | 0  | 13  | 31 | 8  | Stabilisation/motor control (n=20); 3/wk | -                                         | Therapist hands-off (n=20); 3/wk | INT1=5.1(0.8)<br>CON=5.0(0.6)     | -                                                                   | -                                                                       | - | -                                 |
| Seong-Dae et al. 2016 <sup>[124]</sup>        | 30  | 40 | 30 | 13  | NR | 4  | Stabilisation/motor control (n=15); 5/wk | Multimodal (n=15); 5/wk                   | -                                | -                                 | INT1=23.9(7.6)<br>INT2=23.0(6.3)                                    | -                                                                       | - | -                                 |
| Shahrjerdi et al. 2014 <sup>[30]</sup>        | 30  | 38 | 0  | 68  | 44 | 8  | Pilates (n=15); 3/wk                     | -                                         | Therapist hands-on (n=15)        | -                                 | -                                                                   | -                                                                       | - | -                                 |
| Shaughnessy et al. 2004 <sup>[125]</sup>      | 41  | 45 | 14 | 12  | 32 | 10 | Stabilisation/motor control (n=20); 1/wk | -                                         | True (n=21)                      | INT1=46.0(12.0)<br>CON=28.0(14.0) | INT1=26.0(14.0)<br>CON=44.0(16.0)                                   | -                                                                       | - | INT1=72.0(13.0)<br>CON=60.0(17.0) |
| Shen et al. 2009 <sup>[47]</sup>              | 30  | 46 | 30 | 26  | 60 | 4  | McKenzie (n=15)                          | -                                         | Therapist hands-on (n=15)        | -                                 | -                                                                   | -                                                                       | - | -                                 |

|                                              |     |    |    |     |    |    |                                           |                                          |                                 |                                                     |                                                      |                                                       |                                     |   |                                   |
|----------------------------------------------|-----|----|----|-----|----|----|-------------------------------------------|------------------------------------------|---------------------------------|-----------------------------------------------------|------------------------------------------------------|-------------------------------------------------------|-------------------------------------|---|-----------------------------------|
| Sherman et al. 2011 <sup>[126]</sup>         | 228 | 48 | 82 | 563 | NR | 12 | Yoga (n=92); 1/wk                         | Stretching (n=91); 1/wk                  | Therapist hands-off (n=45)      | -                                                   | INT1=6.5(10.8)<br>INT2=5.2(8.0)<br>CON=7.0(10.6)     | -                                                     | -                                   | - | -                                 |
| Shirado et al. 2010 <sup>[24]</sup>          | 201 | 42 | 89 | 13  | 64 | 8  | Multimodal (n=103); 7/wk                  | -                                        | Therapist hands-off (n=98)      | INT1=1.6(1.6)<br>CON=2.3(2.2)                       | INT1=1.0(2.3)<br>CON=1.7(3.0)                        | -                                                     | -                                   | - | -                                 |
| Shnayderman et al. 2013 <sup>[127]</sup>     | 52  | 45 | 11 | 13  | NR | 6  | Resistance (n=26); 2/wk                   | Aerobic (n=26); 2/wk                     | -                               | -                                                   | INT1=19.1(12.8)<br>INT2=22.6(14.4)                   | -                                                     | INT1=6.7(4.4)<br>INT2=5.6(3.4)      | - | INT1=8.0(5.3)<br>INT2=8.8(6.7)    |
| Soares et al. 2016 <sup>[31]</sup>           | 20  | 45 | 20 | 13  | 46 | 5  | Other (n=10); 2/wk                        | -                                        | True (n=10)                     | INT1=0.6(0.4)<br>CON=4.9(1.2)                       | -                                                    | -                                                     | -                                   | - | -                                 |
| Steele et al. 2013 <sup>[49]</sup>           | 24  | 44 | 24 | 675 | 62 | 12 | ^Stabilisation/motor control (n=17); 1/wk | -                                        | True (n=7)                      | INT1=20.1(18.6)<br>CON=33.3(22.5)                   | INT1=17.5(11.5)<br>CON=25.4(11.2)                    | INT1=250.0(112.5)<br>CON=189.6(61.8)                  | -                                   | - | -                                 |
| Ui-Cheol et al. 2015 <sup>[50]</sup>         | 40  | 41 | 0  | 12  | NR | 6  | Multimodal (n=20); 3/wk                   | Stabilisation/motor control (n=20); 3/wk | -                               | -                                                   | -                                                    | -                                                     | -                                   | - | -                                 |
| Ulger et al. 2017 <sup>[128]</sup>           | 113 | 42 | 46 | 12  | 39 | 6  | Stabilisation/motor control (n=57); 3/wk  | -                                        | Therapist hands-on (n=56); 3/wk | INT1=2.1(1.6)<br>CON=2.1(1.2)                       | INT1=23.5(14.2)<br>CON=18.9(13.4)                    | -                                                     | -                                   | - | INT1=57.1(14.1)<br>CON=61.8(17.8) |
| Unsgaard-Tondel et al. 2010 <sup>[129]</sup> | 109 | 40 | 33 | 364 | 66 | 8  | ^Stabilisation/motor control (n=72); 1/wk | Multimodal (n=37); 1/wk                  | -                               | INT1=2.1(1.9)<br>INT2=2.7(2.3)                      | INT1=14.5(9.4)<br>INT2=17.8(9.6)                     | -                                                     | -                                   | - | INT1=7.1(4.8)<br>INT2=8.6(5.1)    |
| Valenza et al. 2017 <sup>[51]</sup>          | 54  | 39 | 13 | 63  | 48 | 8  | Pilates (n=27); 2/wk                      | -                                        | Therapist hands-off (n=27)      | -                                                   | -                                                    | -                                                     | -                                   | - | -                                 |
| Vincent et al. 2014 <sup>[30]</sup>          | 49  | 68 | 17 | 26  | 52 | 17 | Resistance (n=35); 3/wk                   | -                                        | Therapist hands-on (n=14)       | INT1=2.9(2.2)<br>CON=4.6(2.4)                       | -                                                    | -                                                     | INT1=172.7(82.5)<br>CON=161.0(63.0) | - | -                                 |
| Wajswelner et al. 2012 <sup>[131]</sup>      | 87  | 49 | 39 | 725 | 52 | 6  | Pilates (n=44); 2/wk                      | Multimodal (n=43); 2/wk                  | -                               | INT1=2.8(1.6)<br>INT2=3.2(2.1)                      | INT1=74.6(25.0)<br>INT2=77.4(18.1)                   | -                                                     | -                                   | - | INT1=76.3(21.8)<br>INT2=82.6(8.3) |
| Williams et al. 2005 <sup>[133]</sup>        | 44  | 48 | 14 | 584 | 72 | 16 | Yoga (n=20); 6/wk                         | -                                        | Therapist hands-off (n=24)      | INT1=1.0(1.1)<br>CON=2.1(2.3)                       | INT1=3.3(5.1)<br>CON=12.8(11.9)                      | -                                                     | -                                   | - | -                                 |
| Williams et al. 2009 <sup>[132]</sup>        | 90  | 48 | 21 | 274 | 58 | 24 | Yoga (n=43); 7/wk                         | -                                        | Therapist hands-off (n=47)      | INT1=22.9(17.4)<br>CON=36.9(19.8)                   | INT1=16.9(10.3)<br>CON=20.8(10.3)                    | -                                                     | -                                   | - | INT1=4.4(4.3)<br>CON=7.8(6.4)     |
| Yi et al. 2008 <sup>[134]</sup>              | 45  | 52 | 9  | 321 | 49 | 8  | Stabilisation/motor control (n=14); 3/wk  | Resistance (n=17); 2/wk                  | *Multimodal (n=14); 2/wk        | INT1=14.6(14.5)<br>INT2=17.5(16.3)<br>INT3=7.6(7.2) | INT1=14.1(8.9)<br>INT2=16.6(11.7)<br>INT3=12.3(12.8) | INT1=56.6(37.9)<br>INT2=51.9(26.1)<br>INT3=54.8(28.4) | -                                   | - | -                                 |
| Yoo et al. 2014 <sup>[135]</sup>             | 47  | 21 | 47 | 39  | 70 | 8  | Other (n=24); 3/wk                        | -                                        | True (n=23)                     | INT1=2.2(2.2)<br>CON=1.0(0.0)                       | -                                                    | INT1=183.5(58.9)<br>CON=176.2(43.4)                   | -                                   | - | -                                 |
| Young-Dae et al. 2012 <sup>[36]</sup>        | 30  | 20 | NR | 12  | 55 | 4  | Stretching (n=15); 3/wk                   | Stabilisation/motor control (n=15); 3/wk | -                               | INT1=1.8(0.6)<br>INT2=1.3(0.5)                      | -                                                    | INT1=506.3(88.6)<br>INT2=685.1(350.2)                 | -                                   | - | -                                 |
| Yozbatiran et al. 2004 <sup>[137]</sup>      | 30  | 39 | 7  | 13  | 47 | 4  | Multimodal (n=15); 3/wk                   | Water-based (n=15); 3/wk                 | -                               | INT1=2.5(1.6)<br>INT2=1.9(1.7)                      | INT1=21.1(12.7)<br>INT2=20.7(13.5)                   | -                                                     | INT1=80.5(50.5)<br>INT2=82.9(56.2)  | - | -                                 |
| Zadro et al. 2019 <sup>[138]</sup>           | 60  | 68 | 29 | 13  | 50 | 8  | Multimodal (n=30); 3/wk                   | -                                        | True (n=30)                     | INT1=3.8(2.4)<br>CON=4.4(2.3)                       | INT1=4.9(4.5)<br>CON=6.4(4.4)                        | -                                                     | -                                   | - | INT1=32.3(7.1)<br>CON=35.9(5.8)   |
| Zeada 2012 <sup>[159]</sup>                  | 20  | 25 | 20 | 73  | NR | 8  | Pilates (n=10); 4/wk                      | -                                        | True (n=10)                     | -                                                   | INT1=4.7(2.8)<br>CON=6.4(1.3)                        | -                                                     | INT1=52.3(9.6)<br>CON=42.6(4.4)     | - | -                                 |
| Zou et al. 2019 <sup>[140]</sup>             | 43  | 59 | 11 | 12  | 43 | 12 | Other (n=15); 3/wk                        | Stabilisation/motor control (n=15); 3/wk | True (n=13)                     | INT1=3.5(1.0)<br>INT2=4.3(0.8)<br>CON=5.9(0.8)      | -                                                    | -                                                     | -                                   | - | -                                 |

Baseline pain intensity was normalised to a 100-point scale. \* third exercise training intervention, rather than non-exercise training control, ^ pooled data. NR: not reported.

**Supplementary Table 4.** Risk of bias assessment of included studies (n=89) examining the efficacy of exercise training in patients with non-specific chronic low back pain.

| Study                                          | Random sequence generation (selection bias) | Allocation concealment (selection bias) | Blinding of patients and personnel (performance bias) | Blinding of outcome assessment (detection bias) | Incomplete outcome data (attrition bias) | Selective outcome reporting (reporting bias) | Any other bias |
|------------------------------------------------|---------------------------------------------|-----------------------------------------|-------------------------------------------------------|-------------------------------------------------|------------------------------------------|----------------------------------------------|----------------|
| Akbari et al. 2008 <sup>[75]</sup>             | Low                                         | Unclear                                 | High                                                  | Low                                             | High                                     | Low                                          | High           |
| Ali et al. 2013 <sup>[76]</sup>                | Unclear                                     | Unclear                                 | High                                                  | Low                                             | Unclear                                  | Low                                          | Low            |
| Arampatzis et al. 2017 <sup>[77]</sup>         | Low                                         | Unclear                                 | High                                                  | Unclear                                         | High                                     | Low                                          | Low            |
| Areudomwong et al. 2016 <sup>[78]</sup>        | Low                                         | Low                                     | High                                                  | Low                                             | Low                                      | Low                                          | Low            |
| Bae et al. 2018 <sup>[79]</sup>                | Low                                         | Unclear                                 | High                                                  | Unclear                                         | High                                     | Low                                          | Low            |
| Brooks et al. 2012 <sup>[33]</sup>             | Unclear                                     | Unclear                                 | High                                                  | Low                                             | High                                     | Low                                          | Low            |
| Byoung-Hwan et al. 2015 <sup>[80]</sup>        | Unclear                                     | Unclear                                 | High                                                  | Unclear                                         | Unclear                                  | Low                                          | Low            |
| Cai et al. 2017 <sup>[81]</sup>                | Low                                         | Unclear                                 | High                                                  | Low                                             | Low                                      | Low                                          | Low            |
| Chae-Woo et al. 2014 <sup>[82]</sup>           | Unclear                                     | Unclear                                 | High                                                  | Unclear                                         | Unclear                                  | Low                                          | Low            |
| Chatzitheodorou et al. 2007 <sup>[83]</sup>    | Low                                         | High                                    | High                                                  | Unclear                                         | Unclear                                  | Low                                          | Low            |
| Cho et al. 2014 <sup>[84]</sup>                | Unclear                                     | Unclear                                 | High                                                  | Unclear                                         | Unclear                                  | Low                                          | Low            |
| Costa et al. 2009 <sup>[85]</sup>              | Low                                         | Low                                     | High                                                  | Unclear                                         | Low                                      | Low                                          | Low            |
| Cruz-Diaz et al. 2017 <sup>[86]</sup>          | Low                                         | Low                                     | High                                                  | Low                                             | High                                     | Low                                          | Low            |
| Cruz-Diaz et al. 2018 <sup>[34]</sup>          | Low                                         | Unclear                                 | High                                                  | Unclear                                         | Low                                      | Low                                          | Low            |
| del Pozo-Cruz et al. 2011 <sup>[87]</sup>      | Low                                         | Unclear                                 | High                                                  | Low                                             | Low                                      | Low                                          | Low            |
| Dundar et al. 2009 <sup>[88]</sup>             | High                                        | High                                    | High                                                  | Low                                             | Low                                      | High                                         | Low            |
| Ferreira et al. 2007 <sup>[25]</sup>           | Low                                         | Low                                     | High                                                  | Low                                             | Low                                      | Low                                          | Low            |
| Franca et al. 2010 <sup>[90]</sup>             | Low                                         | Low                                     | High                                                  | Low                                             | Unclear                                  | Low                                          | Low            |
| Franca et al. 2012 <sup>[89]</sup>             | Low                                         | Low                                     | High                                                  | Low                                             | Low                                      | Low                                          | Low            |
| Gak et al. 2015 <sup>[91]</sup>                | Unclear                                     | Unclear                                 | High                                                  | Unclear                                         | Unclear                                  | Low                                          | Low            |
| Groessler et al. 2017 <sup>[35]</sup>          | Low                                         | Unclear                                 | High                                                  | Unclear                                         | Low                                      | Low                                          | Low            |
| Gur et al. 2003 <sup>[92]</sup>                | Unclear                                     | Unclear                                 | High                                                  | Low                                             | Unclear                                  | Low                                          | Low            |
| Harts et al. 2009 <sup>[93]</sup>              | Low                                         | Low                                     | High                                                  | Low                                             | High                                     | Low                                          | Low            |
| Hasanpour-Dehkordi et al. 2017 <sup>[94]</sup> | Low                                         | Unclear                                 | High                                                  | Low                                             | High                                     | Low                                          | Low            |
| Heidari et al. 2018 <sup>[95]</sup>            | Low                                         | Unclear                                 | High                                                  | Unclear                                         | Unclear                                  | Unclear                                      | Low            |
| Hosseinfar et al. 2013 <sup>[97]</sup>         | Low                                         | Unclear                                 | High                                                  | Low                                             | High                                     | High                                         | Low            |
| Hosseinfar et al. 2018 <sup>[96]</sup>         | High                                        | High                                    | High                                                  | Unclear                                         | Unclear                                  | Low                                          | Low            |
| Igsoo et al. 2015 <sup>[98]</sup>              | Unclear                                     | Unclear                                 | High                                                  | Unclear                                         | Unclear                                  | Low                                          | Low            |

|                                               |         |         |      |         |         |         |      |
|-----------------------------------------------|---------|---------|------|---------|---------|---------|------|
| Kankaanpaa et al. 1999 <sup>[99]</sup>        | Unclear | Low     | High | Unclear | High    | Low     | Low  |
| Keane 2017 <sup>[37]</sup>                    | Unclear | Low     | High | Unclear | Low     | High    | Low  |
| Kell et al. 2009 <sup>[100]</sup>             | Unclear | Unclear | High | Unclear | High    | Low     | Low  |
| Kell et al. 2011 <sup>[101]</sup>             | Unclear | Unclear | High | Unclear | High    | High    | Low  |
| Kim et al. 2018 <sup>[102]</sup>              | Low     | Unclear | High | Unclear | Unclear | Low     | Low  |
| Kim et al. 2019 <sup>[103]</sup>              | Low     | Unclear | High | Unclear | High    | Low     | Low  |
| Kim Jin et al. 2015 <sup>[38]</sup>           | Unclear | Unclear | High | Unclear | Unclear | Low     | Low  |
| Kliziene et al. 2017 <sup>[27]</sup>          | Unclear | Unclear | High | Unclear | Unclear | High    | Low  |
| Ko et al. 2018 <sup>[104]</sup>               | Low     | Unclear | High | Unclear | Unclear | Low     | Low  |
| Kofotolis et al. 2006 <sup>[28]</sup>         | Unclear | Unclear | High | Unclear | High    | Low     | Low  |
| Kofotolis et al. 2008 <sup>[106]</sup>        | High    | High    | High | Unclear | High    | Low     | Low  |
| Kofotolis et al. 2016 <sup>[105]</sup>        | Low     | Low     | High | Unclear | High    | Low     | Low  |
| Lawand et al. 2015 <sup>[107]</sup>           | Low     | Low     | High | Low     | Low     | Low     | Low  |
| Liu et al. 2019 <sup>[108]</sup>              | Low     | Unclear | High | Low     | Low     | Low     | Low  |
| Macedo et al. 2012 <sup>[109]</sup>           | Low     | Low     | High | Low     | Low     | Low     | Low  |
| Machado et al. 2007 <sup>[32]</sup>           | Low     | Low     | High | Low     | High    | High    | High |
| Masharawi et al. 2013 <sup>[110]</sup>        | Low     | Low     | High | Low     | Low     | Low     | Low  |
| Mazloun et al. 2018 <sup>[111]</sup>          | Low     | Unclear | High | Low     | High    | Low     | Low  |
| Mbada et al. 2014 <sup>[40]</sup>             | High    | High    | High | Low     | High    | High    | Low  |
| McIlveen et al. 1998 <sup>[41]</sup>          | Low     | Low     | High | Unclear | High    | High    | Low  |
| Mostagi et al. 2015 <sup>[23]</sup>           | Low     | Low     | High | Low     | High    | Low     | Low  |
| Muharram et al. 2011 <sup>[112]</sup>         | Unclear | Unclear | High | Unclear | High    | Low     | Low  |
| Murtezani et al. 2011 <sup>[113]</sup>        | Low     | Unclear | High | High    | Low     | Low     | Low  |
| Nambi et al. 2014 <sup>[114]</sup>            | Low     | Unclear | High | Low     | Low     | Low     | Low  |
| Noormohammadpour et al. 2018 <sup>[115]</sup> | Low     | Low     | High | Unclear | High    | Low     | Low  |
| Oh et al. 2014 <sup>[116]</sup>               | Unclear | Unclear | High | Unclear | High    | Low     | Low  |
| Palekar et al. 2015 <sup>[43]</sup>           | Low     | Unclear | High | Unclear | Low     | High    | Low  |
| Patti et al. 2016 <sup>[29]</sup>             | Low     | Low     | High | Low     | Low     | Low     | High |
| Puppin et al. 2011 <sup>[117]</sup>           | High    | High    | High | Unclear | High    | Low     | Low  |
| Saggini et al. 2004 <sup>[45]</sup>           | Unclear | Unclear | High | Unclear | Unclear | High    | Low  |
| Saper et al. 2017 <sup>[46]</sup>             | Low     | Unclear | High | Low     | High    | Low     | Low  |
| Sang Wk et al. 2015 <sup>[118]</sup>          | Unclear | Unclear | High | Unclear | High    | Low     | Low  |
| Schinhan et al. 2016 <sup>[119]</sup>         | Low     | Unclear | High | Low     | Unclear | High    | Low  |
| Sedaghati et al. 2017 <sup>[120]</sup>        | Low     | Unclear | High | Unclear | Unclear | Unclear | Low  |
| Segal-Snir et al. 2016 <sup>[158]</sup>       | Low     | Low     | High | Low     | High    | High    | Low  |
| Se-Hun et al. 2015 <sup>[122]</sup>           | Unclear | Unclear | High | Unclear | Unclear | High    | Low  |
| Seong Hun et al. 2016 <sup>[123]</sup>        | Unclear | Unclear | High | Unclear | Unclear | Low     | Low  |

|                                              |         |         |      |         |         |      |      |
|----------------------------------------------|---------|---------|------|---------|---------|------|------|
| Seong-Dae et al. 2016 <sup>[124]</sup>       | Unclear | Unclear | High | Unclear | Unclear | Low  | Low  |
| Shahrjerdi et al. 2014 <sup>[30]</sup>       | Unclear | Unclear | High | Unclear | High    | Low  | Low  |
| Shaughnessy et al. 2004 <sup>[125]</sup>     | Low     | Unclear | High | Unclear | High    | Low  | Low  |
| Shen et al. 2009 <sup>[47]</sup>             | Unclear | Unclear | High | Unclear | Low     | High | Low  |
| Sherman et al. 2011 <sup>[126]</sup>         | Low     | Low     | High | Low     | Low     | Low  | Low  |
| Shirado et al. 2010 <sup>[24]</sup>          | Low     | High    | High | Low     | High    | High | Low  |
| Shnayderman et al. 2013 <sup>[127]</sup>     | Low     | Low     | High | Low     | Low     | High | Low  |
| Soares et al. 2016 <sup>[31]</sup>           | Unclear | Unclear | High | Unclear | Unclear | Low  | Low  |
| Steele et al. 2013 <sup>[49]</sup>           | Low     | Unclear | High | Unclear | Low     | High | High |
| Ui-Cheol et al. 2015 <sup>[50]</sup>         | Unclear | Unclear | High | Unclear | Unclear | High | Low  |
| Ulger et al. 2017 <sup>[128]</sup>           | Low     | Unclear | High | Low     | High    | Low  | Low  |
| Unsgaard-Tondel et al. 2010 <sup>[129]</sup> | Low     | Low     | High | High    | Low     | Low  | Low  |
| Valenza et al. 2017 <sup>[51]</sup>          | Low     | Low     | High | Low     | Low     | High | Low  |
| Vincent et al. 2014 <sup>[130]</sup>         | Low     | Low     | High | Unclear | High    | Low  | Low  |
| Wajswelner et al. 2012 <sup>[131]</sup>      | Low     | Low     | High | Low     | Low     | Low  | Low  |
| Williams et al. 2005 <sup>[133]</sup>        | Low     | Unclear | High | Low     | Low     | High | High |
| Williams et al. 2009 <sup>[132]</sup>        | Low     | Low     | High | Low     | High    | Low  | Low  |
| Yi et al. 2008 <sup>[134]</sup>              | Unclear | Unclear | High | Unclear | Unclear | High | Low  |
| Yoo et al. 2014 <sup>[135]</sup>             | Unclear | Unclear | High | Unclear | Low     | Low  | High |
| Young-Dae et al. 2012 <sup>[136]</sup>       | Unclear | Unclear | High | Unclear | Unclear | Low  | Low  |
| Yozbatiran et al. 2004 <sup>[137]</sup>      | Unclear | Unclear | High | Unclear | Unclear | Low  | Low  |
| Zadro et al. 2019 <sup>[138]</sup>           | Low     | Unclear | High | Unclear | Low     | Low  | Low  |
| Zeada 2012 <sup>[159]</sup>                  | Unclear | Unclear | High | Unclear | Low     | Low  | Low  |
| Zou et al. 2019 <sup>[140]</sup>             | Low     | Unclear | High | Low     | Low     | Low  | Low  |

See Figure 2 for summary information. It is not possible to truly blind patients to treatment allocation in exercise training trials; thus, this was not included in the overall risk of bias assessment of each study.

**Supplementary Table 5:** Side-split analyses from network meta-analysis of studies examining the efficacy of exercise training in patients with non-specific chronic low back pain.

| Comparison        | Beta coefficients (standard error) |                                 |                         | Significance of difference in estimates (P-value) |       |
|-------------------|------------------------------------|---------------------------------|-------------------------|---------------------------------------------------|-------|
|                   | Direct comparison                  | Indirect comparison via network | Difference in estimates |                                                   |       |
| <b>Pain</b>       |                                    |                                 |                         |                                                   |       |
| CON: True control | INT: Pilates                       | -2.32 (0.42)                    | -1.01 (0.57)            | -1.32 (0.70)                                      | 0.061 |
| CON: True control | INT: Resistance                    | -1.54 (0.70)                    | -0.99 (0.43)            | -0.55 (0.82)                                      | 0.503 |
| CON: True control | INT: Stabilisation                 | -1.31 (0.31)                    | -1.32 (0.33)            | 0.01 (0.45)                                       | 0.989 |
| CON: True control | INT: Stretching                    | -1.14 (0.51)                    | 0.11 (0.60)             | -1.25 (0.79)                                      | 0.113 |
| CON: True control | INT: Yoga                          | -0.24 (0.89)                    | -1.36 (0.63)            | 1.12 (1.09)                                       | 0.308 |
| INT: Aerobic      | CON: True control                  | 0.00 (0.98)                     | 1.94 (0.60)             | -1.94 (1.15)                                      | 0.093 |
| INT: Aerobic      | CON: Hands on                      | 1.95 (0.66)                     | -0.62 (0.70)            | 2.57 (0.96)                                       | 0.007 |
| INT: Aerobic      | INT: Pilates                       | -0.57 (0.92)                    | -0.39 (0.69)            | -0.18 (1.15)                                      | 0.873 |
| INT: Aerobic      | INT: Resistance                    | -2.17 (1.00)                    | 1.21 (0.61)             | -3.38 (1.18)                                      | 0.004 |
| INT: Other        | CON: True control                  | 1.13 (0.36)                     | 0.91 (0.59)             | 0.22 (0.69)                                       | 0.750 |
| INT: Other        | CON: Hands off                     | 1.05 (0.97)                     | 1.19 (0.53)             | -0.14 (1.10)                                      | 0.902 |
| INT: Other        | INT: Stabilisation                 | 0.11 (0.48)                     | -0.55 (0.44)            | 0.66 (0.65)                                       | 0.313 |
| CON: Hands off    | INT: Multimodal                    | -1.06 (0.55)                    | -1.11 (0.54)            | 0.05 (0.77)                                       | 0.952 |
| CON: Hands off    | INT: Stabilisation                 | -1.85 (0.99)                    | -1.32 (0.43)            | -0.53 (1.08)                                      | 0.622 |
| CON: Hands off    | INT: Stretching                    | -1.32 (0.92)                    | -0.47 (0.58)            | -0.84 (1.09)                                      | 0.440 |
| CON: Hands off    | INT: Yoga                          | -0.66 (0.65)                    | -1.64 (0.76)            | 0.97 (1.00)                                       | 0.331 |
| CON: Hands on     | INT: Multimodal                    | -0.01 (0.65)                    | -0.44 (0.43)            | 0.43 (0.77)                                       | 0.583 |
| CON: Hands on     | INT: Resistance                    | -0.35 (0.53)                    | -0.54 (0.50)            | 0.19 (0.73)                                       | 0.792 |
| CON: Hands on     | INT: Stabilisation                 | -0.30 (0.40)                    | -1.08 (0.48)            | 0.78 (0.63)                                       | 0.214 |
| INT: Water-based  | CON: True control                  | 0.47 (0.67)                     | 1.37 (0.69)             | -0.90 (0.96)                                      | 0.346 |
| INT: Water-based  | INT: Multimodal                    | 0.26 (0.66)                     | -0.46 (0.69)            | 0.71 (0.96)                                       | 0.458 |
| INT: Water-based  | INT: Stretching                    | 0.58 (1.00)                     | 0.15 (0.69)             | 0.43 (1.21)                                       | 0.721 |
| INT: McKenzie     | CON: True control                  | 1.35 (0.69)                     | 0.33 (0.65)             | 1.02 (0.95)                                       | 0.285 |
| INT: McKenzie     | INT: Pilates                       | -1.06 (0.69)                    | -1.04 (0.76)            | -0.02 (1.03)                                      | 0.981 |
| INT: McKenzie     | INT: Stabilisation                 | -0.83 (0.68)                    | -0.20 (0.64)            | -0.63 (0.94)                                      | 0.498 |
| INT: Multimodal   | CON: True control                  | 0.25 (0.92)                     | 1.07 (0.30)             | -0.82 (0.97)                                      | 0.396 |
| INT: Multimodal   | INT: Pilates                       | -0.04 (0.65)                    | -1.27 (0.45)            | 1.23 (0.79)                                       | 0.121 |
| INT: Multimodal   | INT: Resistance                    | 0.72 (0.95)                     | -0.31 (0.42)            | 1.03 (1.04)                                       | 0.323 |



|                    |                    |              |              |              |       |
|--------------------|--------------------|--------------|--------------|--------------|-------|
| INT: Multimodal    | INT: Stabilisation | -0.14 (0.31) | -0.62 (0.40) | 0.48 (0.50)  | 0.340 |
| INT: Multimodal    | INT: Yoga          | -1.63 (0.90) | 0.71 (0.59)  | -2.34 (1.07) | 0.029 |
| INT: Pilates       | INT: Stabilisation | 0.64 (0.92)  | 0.53 (0.40)  | 0.11 (1.00)  | 0.917 |
| INT: Resistance    | INT: Stabilisation | -0.41 (0.48) | 0.06 (0.47)  | -0.47 (0.67) | 0.484 |
| INT: Stabilisation | INT: Stretching    | 2.03 (0.70)  | 0.08 (0.47)  | 1.95 (0.84)  | 0.021 |
| <b>Function</b>    |                    |              |              |              |       |
| CON: True control  | INT: Pilates       | -1.21 (0.39) | -0.56 (0.43) | -0.65 (0.58) | 0.258 |
| CON: True control  | INT: Resistance    | -1.76 (0.51) | -0.80 (0.37) | -0.96 (0.63) | 0.125 |
| CON: True control  | INT: Stabilisation | -1.21 (0.28) | -1.05 (0.29) | -0.16 (0.40) | 0.694 |
| CON: True control  | INT: Stretching    | -0.66 (0.46) | -0.42 (0.48) | -0.24 (0.67) | 0.718 |
| CON: True control  | INT: Yoga          | -0.17 (0.71) | -1.20 (0.44) | 1.04 (0.84)  | 0.216 |
| INT: Aerobic       | CON: True control  | 0.67 (0.86)  | 0.90 (0.45)  | -0.23 (0.97) | 0.812 |
| INT: Aerobic       | CON: Hands on      | 1.16 (0.55)  | -0.33 (0.51) | 1.50 (0.75)  | 0.045 |
| INT: Aerobic       | INT: Pilates       | -0.30 (0.75) | 0.04 (0.52)  | -0.34 (0.91) | 0.706 |
| INT: Aerobic       | INT: Resistance    | -1.40 (0.60) | 0.60 (0.53)  | -1.99 (0.82) | 0.015 |
| INT: Other         | CON: True control  | 0.68 (0.44)  | 0.77 (0.43)  | -0.09 (0.62) | 0.887 |
| INT: Other         | CON: Hands off     | 0.40 (0.80)  | 0.42 (0.45)  | -0.02 (0.91) | 0.979 |
| INT: Other         | INT: Water-based   | -0.56 (0.78) | -0.16 (0.50) | -0.40 (0.93) | 0.666 |
| INT: Other         | INT: McKenzie      | 0.78 (0.79)  | 0.30 (0.54)  | 0.48 (0.95)  | 0.614 |
| INT: Other         | INT: Stabilisation | -0.24 (0.47) | -0.54 (0.41) | 0.30 (0.62)  | 0.630 |
| CON: Hands off     | INT: Multimodal    | -0.53 (0.45) | -0.37 (0.42) | -0.16 (0.61) | 0.801 |
| CON: Hands off     | INT: Pilates       | -0.27 (0.77) | -0.72 (0.42) | 0.45 (0.88)  | 0.609 |
| CON: Hands off     | INT: Stretching    | -0.43 (0.52) | -0.06 (0.52) | -0.37 (0.73) | 0.617 |
| CON: Hands off     | INT: Yoga          | -0.45 (0.43) | -0.93 (0.61) | 0.48 (0.74)  | 0.515 |
| CON: Hands on      | INT: Multimodal    | 0.15 (0.52)  | -0.47 (0.37) | 0.62 (0.64)  | 0.328 |
| CON: Hands on      | INT: Resistance    | -0.63 (0.52) | -0.66 (0.39) | 0.02 (0.65)  | 0.973 |
| CON: Hands on      | INT: Stabilisation | -0.45 (0.33) | -0.95 (0.42) | 0.50 (0.53)  | 0.343 |
| INT: Water-based   | CON: True control  | 0.83 (0.45)  | 1.23 (0.54)  | -0.40 (0.70) | 0.568 |
| INT: Water-based   | INT: McKenzie      | 1.35 (0.79)  | 0.38 (0.59)  | 0.97 (0.98)  | 0.323 |
| INT: Water-based   | INT: Multimodal    | 0.60 (0.54)  | -0.02 (0.47) | 0.62 (0.72)  | 0.390 |
| INT: Water-based   | INT: Stretching    | -0.13 (0.83) | 0.66 (0.51)  | -0.79 (0.98) | 0.418 |
| INT: McKenzie      | CON: True control  | 0.62 (0.55)  | -0.04 (0.53) | 0.66 (0.76)  | 0.392 |
| INT: McKenzie      | INT: Pilates       | -0.09 (0.78) | -0.89 (0.52) | 0.80 (0.94)  | 0.397 |
| INT: McKenzie      | INT: Stabilisation | -1.01 (0.57) | -0.74 (0.51) | -0.27 (0.76) | 0.719 |
| INT: Multimodal    | CON: True control  | 0.33 (0.75)  | 0.80 (0.26)  | -0.47 (0.79) | 0.555 |
| INT: Multimodal    | INT: Pilates       | 0.24 (0.54)  | -0.36 (0.37) | 0.60 (0.66)  | 0.364 |
| INT: Multimodal    | INT: Resistance    | 0.37 (0.79)  | -0.53 (0.35) | 0.91 (0.86)  | 0.292 |

|                      |                    |              |              |              |       |
|----------------------|--------------------|--------------|--------------|--------------|-------|
| INT: Multimodal      | INT: Stabilisation | -0.06 (0.30) | -0.77 (0.33) | 0.71 (0.44)  | 0.110 |
| INT: Multimodal      | INT: Yoga          | -1.69 (0.72) | 0.32 (0.41)  | -2.01 (0.83) | 0.015 |
| <b>Mental health</b> |                    |              |              |              |       |
| INT: Multimodal      | CON: True control  | -1.16 (0.51) | -0.05 (0.80) | -1.11 (0.95) | 0.244 |
| INT: Multimodal      | INT: Pilates       | -1.05 (0.48) | -2.04 (0.92) | 1.00 (1.04)  | 0.338 |
| INT: Multimodal      | INT: Resistance    | -1.12 (0.43) | -0.18 (0.58) | -0.93 (0.72) | 0.195 |
| INT: Aerobic         | INT: Multimodal    | 1.43 (0.92)  | 1.04 (0.69)  | 0.39 (1.16)  | 0.738 |
| INT: Aerobic         | INT: Other         | 1.27 (0.54)  | 0.13 (0.73)  | 1.14 (0.91)  | 0.209 |
| INT: Aerobic         | INT: Pilates       | -0.79 (0.52) | 1.21 (0.69)  | -2.00 (0.88) | 0.024 |
| INT: Other           | INT: Pilates       | -1.04 (0.76) | -0.91 (0.66) | -0.13 (1.01) | 0.899 |
| INT: Other           | INT: Resistance    | 0.29 (0.58)  | -1.40 (0.64) | 1.70 (0.86)  | 0.048 |
| CON: Hands on        | INT: Multimodal    | 0.55 (0.79)  | 0.87 (0.58)  | -0.32 (0.98) | 0.745 |
| CON: Hands on        | CON: True control  | 0.38 (0.74)  | -0.47 (0.67) | 0.84 (1.00)  | 0.398 |
| CON: Hands on        | INT: Resistance    | -0.16 (0.54) | 0.19 (0.70)  | -0.35 (0.88) | 0.690 |
| CON: True control    | INT: Resistance    | 0.27 (0.78)  | -0.09 (0.66) | 0.35 (1.02)  | 0.730 |
| <b>Strength</b>      |                    |              |              |              |       |
| INT: Aerobic         | INT: Other         | 0.25 (0.43)  | 0.01 (0.63)  | 0.24 (0.76)  | 0.755 |
| INT: Aerobic         | CON: Hands on      | 0.15 (0.39)  | 0.39 (0.66)  | -0.24 (0.76) | 0.755 |
| INT: Other           | CON: Hands on      | 0.14 (0.50)  | -0.09 (0.58) | 0.24 (0.76)  | 0.755 |

CON: control, INT: exercise training intervention. P-values indicates the significance of the difference in the direct and indirect comparisons and

hence possible presence of inconsistency in the network.

**Supplementary Table 6.** Pain pairwise comparisons of studies examining the efficacy of exercise training in patients with non-specific chronic low back pain.

| Group 1   | Group 2                          | Studies | n    | SMD (95% CI)         | P-value          | I <sup>2</sup> (%) | Low ROB (%) | Egger's P        | GRADE                       |
|-----------|----------------------------------|---------|------|----------------------|------------------|--------------------|-------------|------------------|-----------------------------|
| CON: All  | INT: Aerobic                     | 3       | 139  | -1.33 (-2.62, -0.04) | <b>0.043</b>     | 87                 | 0           | 0.956            | Very low <sup>A,c</sup>     |
| CON: All  | INT: All                         | 47      | 3189 | -1.00 (-1.27, -0.73) | <b>&lt;0.001</b> | 91                 | 6           | <b>&lt;0.001</b> | Very low <sup>a,c,e</sup>   |
| CON: All  | INT: Other                       | 8       | 423  | -1.12 (-1.99, -0.25) | <b>0.012</b>     | 93                 | 0           | <b>&lt;0.001</b> | Very low <sup>A,c,e</sup>   |
| CON: All  | INT: McKenzie                    | 2       | 55   | -                    | -                | -                  | 0           | -                | -                           |
| CON: All  | INT: Multimodal                  | 6       | 538  | -0.57 (-1.39, 0.24)  | 0.168            | 95                 | 17          | <b>0.003</b>     | Very low <sup>a,c,d,e</sup> |
| CON: All  | INT: Pilates                     | 5       | 273  | -2.26 (-2.79, -1.73) | <b>&lt;0.001</b> | 62                 | 0           | 0.536            | Very low <sup>A,c</sup>     |
| CON: All  | INT: Resistance                  | 5       | 399  | -0.84 (-1.75, 0.07)  | 0.072            | 92                 | 0           | 0.241            | Very low <sup>A,c,d</sup>   |
| CON: All  | INT: Stabilisation/motor control | 16      | 954  | -0.99 (-1.38, -0.60) | <b>&lt;0.001</b> | 87                 | 13          | <b>0.001</b>     | Very low <sup>a,c,e</sup>   |
| CON: All  | INT: Stretching                  | 5       | 190  | -1.35 (-2.78, 0.08)  | 0.065            | 95                 | 20          | <b>0.020</b>     | Very low <sup>a,c,d,e</sup> |
| CON: All  | INT: Water-based                 | 2       | 114  | -                    | -                | -                  | 0           | -                | -                           |
| CON: All  | INT: Yoga                        | 3       | 284  | -0.49 (-0.83, -0.14) | <b>0.005</b>     | 46                 | 0           | 0.432            | Very low <sup>A,c</sup>     |
| CON: True | INT: Aerobic                     | 1       | 18   | -                    | -                | -                  | 0           | -                | -                           |
| CON: True | INT: All                         | 28      | 1542 | -1.16 (-1.53, -0.79) | <b>&lt;0.001</b> | 90                 | 4           | <b>&lt;0.001</b> | Very low <sup>a,c,e</sup>   |
| CON: True | INT: Other                       | 7       | 393  | -1.14 (-2.14, -0.13) | <b>0.027</b>     | 94                 | 0           | <b>0.001</b>     | Very low <sup>A,c,e</sup>   |
| CON: True | INT: McKenzie                    | 2       | 55   | -                    | -                | -                  | 0           | -                | -                           |
| CON: True | INT: Multimodal                  | 1       | 60   | -                    | -                | -                  | 0           | -                | -                           |
| CON: True | INT: Pilates                     | 5       | 273  | -2.26 (-2.79, -1.73) | <b>&lt;0.001</b> | 62                 | 0           | 0.536            | Very low <sup>A,c</sup>     |
| CON: True | INT: Resistance                  | 2       | 60   | -                    | -                | -                  | 0           | -                | -                           |
| CON: True | INT: Stabilisation/motor control | 10      | 390  | -1.31 (-1.73, -0.89) | <b>&lt;0.001</b> | 69                 | 10          | 0.420            | Low <sup>a,c</sup>          |
| CON: True | INT: Stretching                  | 4       | 129  | -1.40 (-3.34, 0.53)  | 0.156            | 95                 | 0           | <b>0.013</b>     | Very low <sup>A,c,d,e</sup> |

|                          |                                  |    |      |                      |                  |    |     |              |                           |
|--------------------------|----------------------------------|----|------|----------------------|------------------|----|-----|--------------|---------------------------|
| CON: True                | INT: Water-based                 | 2  | 114  | -                    | -                | -  | 0   | -            | -                         |
| CON: True                | INT: Yoga                        | 1  | 150  | -                    | -                | -  | 0   | -            | -                         |
| CON: Treatment hands-off | INT: All                         | 8  | 519  | -1.06 (-1.62, -0.51) | <b>&lt;0.001</b> | 87 | 13  | <b>0.004</b> | Very low <sup>a,c,e</sup> |
| CON: Treatment hands-off | INT: Other                       | 1  | 30   | -                    | -                | -  | 0   | -            | -                         |
| CON: Treatment hands-off | INT: Multimodal                  | 3  | 264  | -1.14 (-2.80, 0.51)  | 0.177            | 95 | 0   | 0.157        | Very low <sup>A,c,d</sup> |
| CON: Treatment hands-off | INT: Pilates                     | 0  | 0    | -                    | -                | -  | -   | -            | -                         |
| CON: Treatment hands-off | INT: Stabilisation/motor control | 1  | 30   | -                    | -                | -  | 0   | -            | -                         |
| CON: Treatment hands-off | INT: Stretching                  | 1  | 61   | -                    | -                | -  | 100 | -            | -                         |
| CON: Treatment hands-off | INT: Yoga                        | 2  | 134  | -                    | -                | -  | 0   | -            | -                         |
| CON: Treatment hands-on  | INT: Aerobic                     | 2  | 121  | -                    | -                | -  | 0   | -            | -                         |
| CON: Treatment hands-on  | INT: All                         | 11 | 1128 | -0.57 (-1.05, -0.08) | <b>0.023</b>     | 93 | 9   | 0.167        | Low <sup>a,c</sup>        |
| CON: Treatment hands-on  | INT: McKenzie                    | 0  | 0    | -                    | -                | -  | -   | -            | -                         |
| CON: Treatment hands-on  | INT: Multimodal                  | 2  | 214  | -                    | -                | -  | 50  | -            | -                         |
| CON: Treatment hands-on  | INT: Pilates                     | 0  | 0    | -                    | -                | -  | -   | -            | -                         |
| CON: Treatment hands-on  | INT: Resistance                  | 3  | 339  | -0.35 (-1.40, 0.70)  | 0.515            | 93 | 0   | 0.602        | Very low <sup>A,c,d</sup> |
| CON: Treatment hands-on  | INT: Stabilisation/motor control | 5  | 534  | -0.29 (-0.74, 0.16)  | 0.205            | 84 | 20  | 0.643        | Very low <sup>a,c,d</sup> |

CON: control, INT: exercise training intervention, ROB: risk of bias (percentage of studies with low), SMD: standardised mean difference. GRADE certainty ratings, very low: the true effect is probably markedly different from the estimated effect, low: the true effect might be markedly different from the estimated effect, moderate: the true effect is probably close to the estimated effect, high: the true effect is similar to the estimated effect. <sup>A</sup>: certainty rated down two grades based on risk of bias, <sup>a</sup>: certainty rated down one grade based on risk of bias, <sup>b</sup>: certainty rated down one grade based on indirectness, <sup>c</sup>: certainty rated down one grade based on inconsistency, <sup>d</sup>: certainty rated down one grade based on indirectness, <sup>e</sup>: certainty rated down one grade based on publication bias (using Egger's P-value).

**Supplementary Table 7.** Function pairwise comparisons of studies examining the efficacy of exercise training in patients with non-specific chronic low back pain.

| Group 1   | Group 2                          | Studies | n    | SMD (95% CI)         | P-value          | I <sup>2</sup> (%) | Low ROB (%) | Egger's P        | GRADE                       |
|-----------|----------------------------------|---------|------|----------------------|------------------|--------------------|-------------|------------------|-----------------------------|
| CON: All  | INT: Aerobic                     | 3       | 139  | -1.05 (-1.40, -0.69) | <b>&lt;0.001</b> | 0                  | 0           | 0.540            | Low <sup>A</sup>            |
| CON: All  | INT: All                         | 42      | 3202 | -0.72 (-0.93, -0.52) | <b>&lt;0.001</b> | 86                 | 10          | <b>&lt;0.001</b> | Very low <sup>a,c,e</sup>   |
| CON: All  | INT: Other                       | 4       | 277  | -0.60 (-1.15, -0.04) | <b>0.040</b>     | 75                 | 0           | 0.050            | Very low <sup>A,c</sup>     |
| CON: All  | INT: McKenzie                    | 2       | 65   | -                    | -                | -                  | 0           | -                | -                           |
| CON: All  | INT: Multimodal                  | 6       | 538  | -0.25 (-0.80, 0.29)  | 0.370            | 88                 | 17          | 0.140            | Very low <sup>a,c,d</sup>   |
| CON: All  | INT: Pilates                     | 5       | 253  | -0.99 (-1.58, -0.40) | <b>&lt;0.001</b> | 76                 | 0           | 0.740            | Very low <sup>A,c</sup>     |
| CON: All  | INT: Resistance                  | 5       | 415  | -1.58 (-3.20, 0.05)  | 0.060            | 97                 | 0           | <b>&lt;0.001</b> | Very low <sup>A,c,d,e</sup> |
| CON: All  | INT: Stabilisation/motor control | 13      | 861  | -0.87 (-1.27, -0.47) | <b>&lt;0.001</b> | 86                 | 15          | <b>0.010</b>     | Very low <sup>a,c,e</sup>   |
| CON: All  | INT: Stretching                  | 5       | 306  | -0.52 (-0.82, -0.22) | <b>&lt;0.001</b> | 31                 | 40          | 0.240            | Low <sup>a,c</sup>          |
| CON: All  | INT: Water-based                 | 3       | 148  | -0.83 (-1.99, 0.32)  | 0.160            | 88                 | 0           | 0.510            | Very low <sup>A,c,d</sup>   |
| CON: All  | INT: Yoga                        | 4       | 421  | -0.32 (-0.65, 0.00)  | 0.050            | 60                 | 25          | <b>0.010</b>     | Very low <sup>a,c,d,e</sup> |
| CON: True | INT: Aerobic                     | 1       | 18   | -                    | -                | -                  | 0           | -                | -                           |
| CON: True | INT: All                         | 23      | 1378 | -0.92 (-1.22, -0.62) | <b>&lt;0.001</b> | 84                 | 4           | <b>&lt;0.001</b> | Very low <sup>a,c,e</sup>   |
| CON: True | INT: Other                       | 3       | 247  | -0.68 (-1.44, 0.08)  | 0.080            | 84                 | 0           | <b>&lt;0.001</b> | Very low <sup>A,c,d,e</sup> |
| CON: True | INT: McKenzie                    | 2       | 65   | -                    | -                | -                  | 0           | -                | -                           |
| CON: True | INT: Multimodal                  | 1       | 60   | -                    | -                | -                  | 0           | -                | -                           |
| CON: True | INT: Pilates                     | 4       | 215  | -1.18 (-1.77, -0.58) | <b>&lt;0.001</b> | 71                 | 0           | 0.700            | Very low <sup>A,c</sup>     |
| CON: True | INT: Resistance                  | 3       | 125  | -2.35 (-5.17, 0.46)  | 0.100            | 97                 | 0           | <b>&lt;0.001</b> | Very low <sup>A,c,d,e</sup> |
| CON: True | INT: Stabilisation/motor control | 8       | 337  | -1.16 (-1.51, -0.81) | <b>&lt;0.001</b> | 48                 | 13          | 0.390            | Low <sup>a,c</sup>          |
| CON: True | INT: Stretching                  | 3       | 109  | -0.69 (-1.08, -0.30) | <b>&lt;0.001</b> | 0                  | 0           | 0.660            | Low <sup>A</sup>            |

|                          |                                  |    |      |                      |              |    |     |              |                             |
|--------------------------|----------------------------------|----|------|----------------------|--------------|----|-----|--------------|-----------------------------|
| CON: True                | INT: Water-based                 | 3  | 148  | -0.83 (-1.99, 0.32)  | 0.160        | 88 | 0   | 0.510        | Very low <sup>A,c,d</sup>   |
| CON: True                | INT: Yoga                        | 1  | 150  | -                    | -            | -  | 0   | -            | -                           |
| CON: Treatment hands-off | INT All                          | 9  | 755  | -0.46 (-0.78, -0.14) | <b>0.010</b> | 73 | 22  | 0.130        | Low <sup>a,c</sup>          |
| CON: Treatment hands-off | INT: Other                       | 1  | 30   | -                    | -            | -  | 0   | -            | -                           |
| CON: Treatment hands-off | INT: Multimodal                  | 3  | 264  | -0.56 (-1.76, 0.64)  | 0.360        | 92 | 0   | 0.550        | Very low <sup>A,c,d</sup>   |
| CON: Treatment hands-off | INT: Pilates                     | 1  | 38   | -                    | -            | -  | 0   | -            | -                           |
| CON: Treatment hands-off | INT: Stabilisation/motor control | 0  | 0    | -                    | -            | -  | -   | -            | -                           |
| CON: Treatment hands-off | INT: Stretching                  | 2  | 197  | -                    | -            | -  | 100 | -            | -                           |
| CON: Treatment hands-off | INT: Yoga                        | 3  | 271  | -0.42 (-0.92, 0.09)  | 0.110        | 73 | 33  | <b>0.010</b> | Very low <sup>a,c,d,e</sup> |
| CON: Treatment hands-on  | INT: Aerobic                     | 2  | 121  | -                    | -            | -  | 0   | -            | -                           |
| CON: Treatment hands-on  | INT: All                         | 10 | 1069 | -0.55 (-0.94, -0.15) | <b>0.010</b> | 88 | 10  | 0.090        | Low <sup>a,c</sup>          |
| CON: Treatment hands-on  | INT: McKenzie                    | 0  | 0    | -                    | -            | -  | -   | -            | -                           |
| CON: Treatment hands-on  | INT: Multimodal                  | 2  | 214  | -                    | -            | -  | 50  | -            | -                           |
| CON: Treatment hands-on  | INT: Pilates                     | 0  | 0    | -                    | -            | -  | -   | -            | -                           |
| CON: Treatment hands-on  | INT: Resistance                  | 2  | 290  | -                    | -            | -  | 0   | -            | -                           |
| CON: Treatment hands-on  | INT: Stabilisation/motor control | 5  | 524  | -0.45 (-1.10, 0.21)  | 0.180        | 92 | 20  | 0.130        | Very low <sup>a,c,d</sup>   |

CON: control, INT: exercise training intervention, ROB: risk of bias (percentage of studies with low), SMD: standardised mean difference. GRADE certainty ratings, very low: the true effect is probably markedly different from the estimated effect, low: the true effect might be markedly different from the estimated effect, moderate: the true effect is probably close to the estimated effect, high: the true effect is similar to the estimated effect. <sup>A</sup>: certainty rated down two grades based on risk of bias, <sup>a</sup>: certainty rated down one grade based on risk of bias, <sup>b</sup>: certainty rated down one grade based on indirectness, <sup>c</sup>: certainty rated down one grade based on inconsistency, <sup>d</sup>: certainty rated down one grade based on indirectness, <sup>e</sup>: certainty rated down one grade based on publication bias (using Egger's P-value).

**Supplementary Table 8.** Mental health pairwise comparisons of studies examining the efficacy of exercise training in patients with non-specific chronic low back pain.

| Group 1   | Group 2                          | Studies | n    | SMD (95% CI)         | P-value          | I <sup>2</sup> (%) | Low ROB (%) | Egger's P    | GRADE                       |
|-----------|----------------------------------|---------|------|----------------------|------------------|--------------------|-------------|--------------|-----------------------------|
| CON: All  | INT: Aerobic                     | 3       | 139  | -1.32 (-1.69, -0.96) | <b>&lt;0.001</b> | 0                  | 0           | 0.231        | Low <sup>A</sup>            |
| CON: All  | INT: All                         | 17      | 1305 | -0.77 (-1.08, -0.46) | <b>&lt;0.001</b> | 84                 | 6           | <b>0.016</b> | Very low <sup>a,c,e</sup>   |
| CON: All  | INT: Other                       | 1       | 164  | -                    | -                | -                  | 0           | -            | -                           |
| CON: All  | INT: McKenzie                    | 0       | 0    | -                    | -                | -                  | -           | -            | -                           |
| CON: All  | INT: Multimodal                  | 2       | 93   | -                    | -                | -                  | 0           | -            | -                           |
| CON: All  | INT: Pilates                     | 2       | 163  | -                    | -                | -                  | 0           | -            | -                           |
| CON: All  | INT: Resistance                  | 4       | 365  | -1.10 (-2.30, 0.10)  | 0.073            | 94                 | 0           | 0.075        | Very low <sup>A,c,d</sup>   |
| CON: All  | INT: Stabilisation/motor control | 4       | 238  | -0.68 (-1.43, 0.07)  | 0.077            | 85                 | 0           | 0.220        | Very low <sup>A,c,d</sup>   |
| CON: All  | INT: Stretching                  | 2       | 80   | -                    | -                | -                  | 50          | -            | -                           |
| CON: All  | INT: Water-based                 | 1       | 19   | -                    | -                | -                  | 0           | -            | -                           |
| CON: All  | INT: Yoga                        | 1       | 90   | -                    | -                | -                  | 0           | -            | -                           |
| CON: True | INT: Aerobic                     | 1       | 18   | -                    | -                | -                  | 0           | -            | -                           |
| CON: True | INT: All                         | 10      | 647  | -0.87 (-1.33, -0.42) | <b>&lt;0.001</b> | 85                 | 0           | <b>0.007</b> | Very low <sup>A,c,e</sup>   |
| CON: True | INT: Other                       | 1       | 164  | -                    | -                | -                  | 0           | -            | -                           |
| CON: True | INT: McKenzie                    | 0       | 0    | -                    | -                | -                  | -           | -            | -                           |
| CON: True | INT: Multimodal                  | 1       | 60   | -                    | -                | -                  | 0           | -            | -                           |
| CON: True | INT: Pilates                     | 2       | 163  | -                    | -                | -                  | 0           | -            | -                           |
| CON: True | INT: Resistance                  | 3       | 125  | -1.18 (-3.01, 0.64)  | 0.205            | 95                 | 0           | <b>0.006</b> | Very low <sup>A,c,d,e</sup> |
| CON: True | INT: Stabilisation/motor control | 3       | 125  | -1.08 (-1.47, -0.70) | <b>&lt;0.001</b> | 1                  | 0           | 0.821        | Very low <sup>A,c</sup>     |
| CON: True | INT: Stretching                  | 1       | 19   | -                    | -                | -                  | 0           | -            | -                           |

|                          |                                  |   |     |                      |              |    |     |       |                         |
|--------------------------|----------------------------------|---|-----|----------------------|--------------|----|-----|-------|-------------------------|
| CON: True                | INT: Water-based                 | 1 | 19  | -                    | -            | -  | 0   | -     | -                       |
| CON: True                | INT: Yoga                        | 0 | 0   | -                    | -            | -  | -   | -     | -                       |
| CON: Treatment hands-off | INT: All                         | 3 | 184 | -0.53 (-0.88, -0.18) | <b>0.003</b> | 26 | 33  | 0.198 | Low <sup>a,c</sup>      |
| CON: Treatment hands-off | INT: Other                       | 0 | 0   | -                    | -            | -  | -   | -     | -                       |
| CON: Treatment hands-off | INT: Multimodal                  | 1 | 33  | -                    | -            | -  | 0   | -     | -                       |
| CON: Treatment hands-off | INT: Pilates                     | 0 | 0   | -                    | -            | -  | -   | -     | -                       |
| CON: Treatment hands-off | INT: Stabilisation/motor control | 0 | 0   | -                    | -            | -  | -   | -     | -                       |
| CON: Treatment hands-off | INT: Stretching                  | 1 | 61  | -                    | -            | -  | 100 | -     | -                       |
| CON: Treatment hands-off | INT: Yoga                        | 1 | 90  | -                    | -            | -  | 0   | -     | -                       |
| CON: Treatment hands-on  | INT: Aerobic                     | 2 | 121 | -                    | -            | -  | 0   | -     | -                       |
| CON: Treatment hands-on  | INT: All                         | 4 | 474 | -0.79 (-1.56, -0.03) | <b>0.042</b> | 92 | 0   | 0.497 | Very low <sup>A,c</sup> |
| CON: Treatment hands-on  | INT: McKenzie                    | 0 | 0   | -                    | -            | -  | -   | -     | -                       |
| CON: Treatment hands-on  | INT: Multimodal                  | 0 | 0   | -                    | -            | -  | -   | -     | -                       |
| CON: Treatment hands-on  | INT: Pilates                     | 0 | 0   | -                    | -            | -  | -   | -     | -                       |
| CON: Treatment hands-on  | INT: Resistance                  | 1 | 240 | -                    | -            | -  | 0   | -     | -                       |
| CON: Treatment hands-on  | INT: Stabilisation/motor control | 1 | 113 | -                    | -            | -  | 0   | -     | -                       |

CON: control, INT: exercise training intervention, ROB: risk of bias (percentage of studies with low), SMD: standardised mean difference. GRADE certainty ratings, very low: the true effect is probably markedly different from the estimated effect, low: the true effect might be markedly different from the estimated effect, moderate: the true effect is probably close to the estimated effect, high: the true effect is similar to the estimated effect. <sup>A</sup>: certainty rated down two grades based on risk of bias, <sup>a</sup>: certainty rated down one grade based on risk of bias, <sup>b</sup>: certainty rated down one grade based on indirectness, <sup>c</sup>: certainty rated down one grade based on inconsistency, <sup>d</sup>: certainty rated down one grade based on indirectness, <sup>e</sup>: certainty rated down one grade based on publication bias (using Egger's P-value).



**Supplementary Table 9.** Muscle strength pairwise comparisons of studies examining the efficacy of exercise training in patients with non-specific chronic low back pain.

| Group 1   | Group 2                          | Studies | n   | SMD (95% CI)       | P-value | I <sup>2</sup> (%) | Low ROB (%) | Egger's P | GRADE                     |
|-----------|----------------------------------|---------|-----|--------------------|---------|--------------------|-------------|-----------|---------------------------|
| CON: All  | INT: Aerobic                     | 0       | 0   | -                  | -       | -                  | -           | -         | -                         |
| CON: All  | INT: All                         | 6       | 252 | 0.29 (0.00, 0.58)  | 0.050   | 14                 | 0           | 0.289     | Very low <sup>A,c</sup>   |
| CON: All  | INT: Other                       | 2       | 84  | -                  | -       | -                  | 0           | -         | -                         |
| CON: All  | INT: McKenzie                    | 0       | 0   | -                  | -       | -                  | -           | -         | -                         |
| CON: All  | INT: Multimodal                  | 0       | 0   | -                  | -       | -                  | -           | -         | -                         |
| CON: All  | INT: Pilates                     | 0       | 0   | -                  | -       | -                  | -           | -         | -                         |
| CON: All  | INT: Resistance                  | 2       | 114 | -                  | -       | -                  | 0           | -         | -                         |
| CON: All  | INT: Stabilisation/motor control | 2       | 54  | -                  | -       | -                  | 0           | -         | -                         |
| CON: All  | INT: Stretching                  | 0       | 0   | -                  | -       | -                  | -           | -         | -                         |
| CON: All  | INT: Water-based                 | 0       | 0   | -                  | -       | -                  | -           | -         | -                         |
| CON: All  | INT: Yoga                        | 0       | 0   | -                  | -       | -                  | -           | -         | -                         |
| CON: True | INT: Aerobic                     | 0       | 0   | -                  | -       | -                  | -           | -         | -                         |
| CON: True | INT: All                         | 5       | 203 | 0.34 (-0.05, 0.74) | 0.090   | 40                 | 0           | 0.403     | Very low <sup>A,c,d</sup> |
| CON: True | INT: Other                       | 2       | 84  | -                  | -       | -                  | 0           | -         | -                         |
| CON: True | INT: McKenzie                    | 0       | 0   | -                  | -       | -                  | -           | -         | -                         |
| CON: True | INT: Multimodal                  | 0       | 0   | -                  | -       | -                  | -           | -         | -                         |
| CON: True | INT: Pilates                     | 0       | 0   | -                  | -       | -                  | -           | -         | -                         |
| CON: True | INT: Resistance                  | 1       | 65  | -                  | -       | -                  | 0           | -         | -                         |
| CON: True | INT: Stabilisation/motor control | 2       | 54  | -                  | -       | -                  | 0           | -         | -                         |
| CON: True | INT: Stretching                  | 0       | 0   | -                  | -       | -                  | -           | -         | -                         |

|                          |                                  |   |    |   |   |   |   |   |   |
|--------------------------|----------------------------------|---|----|---|---|---|---|---|---|
| CON: True                | INT: Water-based                 | 0 | 0  | - | - | - | - | - | - |
| CON: True                | INT: Yoga                        | 0 | 0  | - | - | - | - | - | - |
| CON: Treatment hands-off | INT: All                         | 0 | 0  | - | - | - | - | - | - |
| CON: Treatment hands-off | INT: Other                       | 0 | 0  | - | - | - | - | - | - |
| CON: Treatment hands-off | INT: Multimodal                  | 0 | 0  | - | - | - | - | - | - |
| CON: Treatment hands-off | INT: Pilates                     | 0 | 0  | - | - | - | - | - | - |
| CON: Treatment hands-off | INT: Stabilisation/motor control | 0 | 0  | - | - | - | - | - | - |
| CON: Treatment hands-off | INT: Stretching                  | 0 | 0  | - | - | - | - | - | - |
| CON: Treatment hands-off | INT: Yoga                        | 0 | 0  | - | - | - | - | - | - |
| CON: Treatment hands-on  | INT: Aerobic                     | 0 | 0  | - | - | - | - | - | - |
| CON: Treatment hands-on  | INT: All                         | 1 | 49 | - | - | - | 0 | - | - |
| CON: Treatment hands-on  | INT: McKenzie                    | 0 | 0  | - | - | - | - | - | - |
| CON: Treatment hands-on  | INT: Multimodal                  | 0 | 0  | - | - | - | - | - | - |
| CON: Treatment hands-on  | INT: Pilates                     | 0 | 0  | - | - | - | - | - | - |
| CON: Treatment hands-on  | INT: Resistance                  | 1 | 49 | - | - | - | 0 | - | - |
| CON: Treatment hands-on  | INT: Stabilisation/motor control | 0 | 0  | - | - | - | - | - | - |

CON: control, INT: exercise training intervention, ROB: risk of bias (percentage of studies with low), SMD: standardised mean difference. GRADE certainty ratings, very low: the true effect is probably markedly different from the estimated effect, low: the true effect might be markedly different from the estimated effect, moderate: the true effect is probably close to the estimated effect, high: the true effect is similar to the estimated effect. <sup>A</sup>: certainty rated down two grades based on risk of bias, <sup>a</sup>: certainty rated down one grade based on risk of bias, <sup>b</sup>: certainty rated down one grade based on indirectness, <sup>c</sup>: certainty rated down one grade based on inconsistency, <sup>d</sup>: certainty rated down one grade based on indirectness, <sup>e</sup>: certainty rated down one grade based on publication bias (using Egger's P-value).

**Supplementary Table 10.** Muscle endurance pairwise comparisons of studies examining the efficacy of exercise training in patients with non-specific chronic low back pain.

| Group 1   | Group 2                          | Studies | n   | SMD (95% CI)      | P-value          | I <sup>2</sup> (%) | Low ROB (%) | Egger's P    | GRADE                     |
|-----------|----------------------------------|---------|-----|-------------------|------------------|--------------------|-------------|--------------|---------------------------|
| CON: All  | INT: Aerobic                     | 1       | 18  | -                 | -                | -                  | 0           | -            | -                         |
| CON: All  | INT: All                         | 6       | 322 | 2.73 (0.30, 5.16) | <b>0.028</b>     | 98                 | 0           | <b>0.002</b> | Very low <sup>A,c,e</sup> |
| CON: All  | INT: Other                       | 1       | 34  | -                 | -                | -                  | 0           | -            | -                         |
| CON: All  | INT: McKenzie                    | 1       | 34  | -                 | -                | -                  | 0           | -            | -                         |
| CON: All  | INT: Multimodal                  | 0       | 0   | -                 | -                | -                  | -           | -            | -                         |
| CON: All  | INT: Pilates                     | 2       | 74  | -                 | -                | -                  | 0           | -            | -                         |
| CON: All  | INT: Resistance                  | 1       | 18  | -                 | -                | -                  | 0           | -            | -                         |
| CON: All  | INT: Stabilisation/motor control | 2       | 153 | -                 | -                | -                  | 0           | -            | -                         |
| CON: All  | INT: Stretching                  | 0       | 0   | -                 | -                | -                  | -           | -            | -                         |
| CON: All  | INT: Water-based                 | 1       | 34  | -                 | -                | -                  | 0           | -            | -                         |
| CON: All  | INT: Yoga                        | 0       | 0   | -                 | -                | -                  | -           | -            | -                         |
| CON: True | INT: Aerobic                     | 1       | 18  | -                 | -                | -                  | 0           | -            | -                         |
| CON: True | INT: All                         | 5       | 255 | 1.57 (0.69, 2.45) | <b>&lt;0.001</b> | 87                 | 0           | 0.509        | Very low <sup>A,c</sup>   |
| CON: True | INT: Other                       | 1       | 34  | -                 | -                | -                  | 0           | -            | -                         |
| CON: True | INT: McKenzie                    | 1       | 34  | -                 | -                | -                  | 0           | -            | -                         |
| CON: True | INT: Multimodal                  | 0       | 0   | -                 | -                | -                  | -           | -            | -                         |
| CON: True | INT: Pilates                     | 2       | 74  | -                 | -                | -                  | 0           | -            | -                         |
| CON: True | INT: Resistance                  | 1       | 18  | -                 | -                | -                  | 0           | -            | -                         |
| CON: True | INT: Stabilisation/motor control | 1       | 86  | -                 | -                | -                  | 0           | -            | -                         |
| CON: True | INT: Stretching                  | 0       | 0   | -                 | -                | -                  | -           | -            | -                         |

|                          |                                  |   |    |   |   |   |   |   |   |
|--------------------------|----------------------------------|---|----|---|---|---|---|---|---|
| CON: True                | INT: Water-based                 | 1 | 34 | - | - | - | 0 | - | - |
| CON: True                | INT: Yoga                        | 0 | 0  | - | - | - | - | - | - |
| CON: Treatment hands-off | INT: All                         | 0 | 0  | - | - | - | - | - | - |
| CON: Treatment hands-off | INT: Other                       | 0 | 0  | - | - | - | - | - | - |
| CON: Treatment hands-off | INT: Multimodal                  | 0 | 0  | - | - | - | - | - | - |
| CON: Treatment hands-off | INT: Pilates                     | 0 | 0  | - | - | - | - | - | - |
| CON: Treatment hands-off | INT: Stabilisation/motor control | 0 | 0  | - | - | - | - | - | - |
| CON: Treatment hands-off | INT: Stretching                  | 0 | 0  | - | - | - | - | - | - |
| CON: Treatment hands-off | INT: Yoga                        | 0 | 0  | - | - | - | - | - | - |
| CON: Treatment hands-on  | INT: Aerobic                     | 0 | 0  | - | - | - | - | - | - |
| CON: Treatment hands-on  | INT: All                         | 1 | 67 | - | - | - | 0 | - | - |
| CON: Treatment hands-on  | INT: McKenzie                    | 0 | 0  | - | - | - | - | - | - |
| CON: Treatment hands-on  | INT: Multimodal                  | 0 | 0  | - | - | - | - | - | - |
| CON: Treatment hands-on  | INT: Pilates                     | 0 | 0  | - | - | - | - | - | - |
| CON: Treatment hands-on  | INT: Resistance                  | 0 | 0  | - | - | - | - | - | - |
| CON: Treatment hands-on  | INT: Stabilisation/motor control | 1 | 67 | - | - | - | 0 | - | - |

CON: control, INT: exercise training intervention, ROB: risk of bias (percentage of studies with low), SMD: standardised mean difference. GRADE certainty ratings, very low: the true effect is probably markedly different from the estimated effect, low: the true effect might be markedly different from the estimated effect, moderate: the true effect is probably close to the estimated effect, high: the true effect is similar to the estimated effect. <sup>A</sup>: certainty rated down two grades based on risk of bias, <sup>a</sup>: certainty rated down one grade based on risk of bias, <sup>b</sup>: certainty rated down one grade based on indirectness, <sup>c</sup>: certainty rated down one grade based on inconsistency, <sup>d</sup>: certainty rated down one grade based on indirectness, <sup>e</sup>: certainty rated down one grade based on publication bias (using Egger's P-value).

**Supplementary Table 11.** Calculation of pooled standard deviation (SD) for the Oswestry Disability Index and Roland Morris Disability Questionnaire.

| <b>Tool</b>                                                                                                                                                        | <b>Pooled SD</b> | <b>Min-Max</b> | <b>N</b> | <b>Groups</b> | <b>Scaled 0-100</b> |
|--------------------------------------------------------------------------------------------------------------------------------------------------------------------|------------------|----------------|----------|---------------|---------------------|
| Oswestry Disability Index <sup>[28, 29, 33, 37, 41, 49, 51, 76, 79, 80, 87-90, 92, 96-98, 100-103, 106, 111, 113, 117-119, 124, 125, 127-129, 132, 134, 137]</sup> | 12               | 0-100          | 1974     | 87            | 12                  |
| Roland Morris Disability Questionnaire <sup>[24, 25, 32, 35, 46, 78, 83, 85, 86, 93, 105, 107, 109, 110, 115, 121, 126, 138, 139]</sup>                            | 5                | 0-24           | 1931     | 43            | 20                  |

Pooled SD at baseline from all studies which used the tool and reported pre-intervention SD. Min-Max: the minimum and maximum values of the tool, N: total number of participants with data, groups: total number of intervention and control groups with data, scaled 0-100: pooled SD scaled to a 100-point scale.
